1 **Interferon-gamma mediates skeletal muscle lesions through JAK/STAT pathway activation**  
2 **in inclusion body myositis**

3 Cyrielle Hou, PharmD, PhD<sup>1</sup>, Baptiste Periou, MS<sup>1,3</sup>, Marianne Gervais PharmD, PhD<sup>1</sup>, Juliette  
4 Berthier<sup>1</sup>, Yasmine Baba-Amer<sup>1</sup>, Sarah Souvannanorath, MD<sup>3</sup>, Edoardo Malfatti, MD<sup>1,2,3</sup>, Frédéric  
5 Relaix, PhD<sup>1</sup>, Maximilien Bencze PhD\*<sup>1</sup>, François Jérôme Authier, MD, PhD<sup>1,2,3\*</sup>✉

6

7 Authors' affiliations

8 1Univ Paris Est Créteil, INSERM, IMRB, F-94010 Créteil, France.

9 2Reference Centre for Neuromuscular Diseases "Nord-Est-Ile de France", FILNEMUS, France.

10 3AP-HP, Hôpital Mondor, Service d'histologie, F-94010 Créteil, France.

11 ✉ Corresponding author: francois-jerome.authier@aphp.fr

12 \*Equal contribution

13

14 Keywords: Inclusion body myositis (IBM); Inflammatory myopathies; IFN $\gamma$ ; JAK-STAT; skeletal muscle;  
15 myogenesis; satellite cells.

16

17 Author Contribution

18 CH designed, performed all *in vitro* and *in vivo* experiments, and analyzed results. BP performed  
19 macro analysis and help with several experiments. MGT performed *in vivo* experiments. JB, MGT  
20 performed muscle clearing and analyzed them. YBA contributed to human muscle sample processing.  
21 FJA, SS, and EM performed muscle biopsies. FJA checked clinical and histopathological data for  
22 included patients.

23 FJA and MB designed and supervised the project and oversaw experiments. CH and FJA wrote the  
24 manuscript. BP, MB, MGT, EM, SS and FR read and edited the manuscript. CH, FJA, FR obtained  
25 funding.

26 All authors were involved in revising it critically for important intellectual content.

27

28

29 Acknowledgments

30 This work was supported by funding from Association Française contre les Myopathies (AFM) via  
31 TRANSLAMUSCLE (PROJECT 19507). C. Hou benefited from Région Ile-de-France ARDOC Fellowship  
32 and RHU CARMMA Fellowship, and was recipient of Société Française de Myologie prize (2017). B.  
33 Periou benefited from RHU CARMMA Fellowship.

34

35 Competing Interests statement

36 None of the co-authors has any conflict of interest to disclose in link with this work.

37

38 Abstract

39 Dysimmune and Inflammatory Myopathies (DIMs) are acquired idiopathic myopathy associated with  
40 immune response dysregulation. Inclusion Body Myositis (IBM), the most common DIMs, is  
41 characterized by endomysial infiltrates of cytotoxic T lymphocytes CD8, muscle type II-interferon  
42 (IFN $\gamma$ ) signature, and by the lack of response to immunomodulatory therapies. We showed that IBM  
43 was pathologically characterized by the presence of chronic degenerative myopathic features  
44 including myofiber atrophy, fibrosis, adipose involution, and the altered functions of skeletal muscle  
45 stem cells. Here, we demonstrated that protracted systemic exposure to IFN $\gamma$  delayed muscle  
46 regeneration and led to IBM-like muscular degenerative changes in mice. *In vitro*, IFN $\gamma$  treatment  
47 inhibited the activation, proliferation, migration, differentiation, and fusion of myogenic progenitor  
48 cells and promoted their senescence through JAK-STAT-dependent activation. Finally, JAK-STAT  
49 inhibitor, ruxolitinib abrogated the deleterious effects of IFN $\gamma$  on muscle regeneration, suggesting  
50 that the JAK-STAT pathway could represent a new therapeutic target for IBM.

51

52

## 53 Introduction

54 Dysimmune and Inflammatory Myopathies (DIMs) differ from each other by the profile of muscle  
55 tissue injuries and pathological mechanisms. Among DIMs, inclusion body myositis (IBM) is  
56 characterized by a slowly progressive muscle involvement with unique clinical and pathological  
57 features. IBM disease typically occurs over 50 years, with insidious progression and asymmetrical,  
58 proximodistal, muscle involvement mainly affecting finger flexors and quadriceps<sup>1</sup>. Unlike other  
59 DIMs, IBM is regarded as refractory to immunosuppressive therapies, and therefore probably one of  
60 the most disabling<sup>2</sup>. From a pathological view, IBM combines immune-mediated polymyositis-type  
61 inflammatory process with degenerative features including myofiber atrophy, amyloid deposits ( $\beta$ -  
62 APP), rimmed vacuoles, and fibrosis in the muscle<sup>3,4</sup>. Inflammatory infiltrates contain predominantly  
63 cytotoxic CD8+ T lymphocytes that mediate myonecrosis but the mechanisms underlying muscle  
64 dysfunction in IBM remains largely unknown<sup>5</sup>. In the vicinity of these infiltrates, muscle fibers in IBM  
65 abnormally express Major-Histocompatibility Class I (MHC-I) and class II (MHC-II) molecules on their  
66 surface<sup>6</sup> that is associated with muscular type 2 IFN (IFN $\gamma$ ) signature<sup>7-9</sup>.

67 IFN $\gamma$  is a potent inducer of MHC-II expression through the activation of JAK-STAT pathway and CIITA  
68 transactivator<sup>10-12</sup>. IFN $\gamma$  is a cytokine that is produced by immune cells, including T lymphocytes and  
69 natural killer (NK) cells, and which is required for innate and adaptive immunity against infection.  
70 IFN $\gamma$  is a mediator for macrophage polarization, lymphocyte regulation, proliferation, and  
71 survival<sup>12,13</sup>. On the other hand, the implication of IFN $\gamma$  in muscle homeostasis and repair remains  
72 controversial. In mice, transient IFN $\gamma$  injection improves muscle function and decreases fibrosis after  
73 laceration injury<sup>14</sup>. Inactivation of IFN $\gamma$  *in vivo* negatively impacts muscle regeneration by impairing  
74 macrophage function, decreasing myogenic cell proliferation, and increasing fibrosis<sup>15</sup>. In addition,  
75 the overexpression of IFN $\gamma$  at the neuromuscular junction induces necrotizing myopathy<sup>16</sup> and the  
76 loss of IFN $\gamma$  in mdx mice ameliorates their dystrophic phenotype. Finally, these data suggest a  
77 possible role for aberrant IFN $\gamma$  signature in IBM-associated muscle damage.

78

79 To address this question, we examined transcriptomic and histological profiles of muscle biopsies  
80 from DIMs patients and analyzed *in vivo* and *in vitro* the impact of sustained IFN $\gamma$  exposure on  
81 skeletal muscle tissue and myogenic cell behavior. We confirmed that IBM displays the strongest  
82 muscular IFN $\gamma$  signature among DIMs. Experimentally, increased plasma IFN $\gamma$  delayed post-injury  
83 muscle regeneration and induced IBM-like muscle changes including positive MHC-II myofibers,  
84 fibrosis, adipose involution, and myofiber atrophy. The deleterious effects of IFN $\gamma$  were prevented by  
85 ruxolitinib, an inhibitor of the JAK-STAT pathway. *In vitro* IFN $\gamma$  exposure promoted senescence and  
86 reduced activation, proliferation, migration, differentiation, and fusion of human muscle progenitor  
87 cells (MPC), all these effects being reversed by ruxolitinib treatment. Altogether, our data  
88 demonstrate that IBM muscles are characterized by an upregulation of the IFN $\gamma$  signaling and that  
89 aberrant muscle IFN $\gamma$  expression recapitulates IBM muscle phenotype, which can be reverted by  
90 targeting the JAK-STAT pathway. This work offers new therapeutic approaches for IBM patients using  
91 JAK-STAT inhibitors.

92

## 93 Results

94

### 95 **IBM differs from other DIMs by its highest muscular IFN $\gamma$ signature**

96 We performed RNA-sequencing (RNA-seq) and histological study in muscle samples from healthy  
97 human controls (CTL, n=5), and patients with dermatomyositis (DM, n=5), anti-synthetase syndrome  
98 (ASS, n=5), and IBM (n=4). Gene expression profile in IBM strikingly differed from DM with 1816  
99 genes differentially expressed, while only 190 genes differed between DM and ASS, and 14 genes  
100 between IBM and ASS (*Figure S1A*). T-lymphocytes infiltrates are predominant in IBM muscle<sup>18,19</sup>.  
101 Gene ontology and analysis showed upregulated genes involved in T lymphocytes  
102 activation/proliferation, macrophage activation, and MHC-II protein expression in IBM muscles  
103 (*Figure 1A, B*). IFN-I signaling was upregulated in DM muscles compared to the CTL, ASS, and IBM  
104 (*Figure S1B*). In contrast, IFN $\gamma$  expression and its IFN $\gamma$  gene signaling were significantly upregulated in  
105 IBM and ASS, as confirmed by transcriptomic and RT-qPCR analysis (*Figure 1B, C*). Interestingly, IFN-II-  
106 related genes were strongly overexpressed in IBM patients (*Figure 1B*). DM presented some  
107 upregulated IFN-II-related genes compared to the CTL (*Figure 1B*) but the IFN-II signature was weaker  
108 in DM than in ASS and IBM patients. The expression of the *Hla-dr*, *-dm*, *-dq* genes was higher in IBM,  
109 moderately increased in ASS, and minimally increased in DM compared to CTL muscle biopsies  
110 (*Figure 1B, C*). Overall, the level of regulation of *Mhc-II* expression is correlated to *Ifny* expression,  
111 especially in ASS and IBM patients (*Figure 1D*).

112 IFN-I/II cytokines are both potent inducers of MHC-I while IFN $\gamma$  solely induces MHC-II expression  
113 through CIITA activation<sup>10</sup>. To histologically discriminate the type of IFN signature on CTL, DM, ASS,  
114 and IBM muscles, we performed immunostaining of MHC-I and MHC-II. Healthy CTL muscles,  
115 myofibers did not express MHC-I nor MHC-II proteins. In contrast, while all myofibers expressed  
116 MHC-I but not MHC-II in DM, myofibers expressed both MHC-I and MHC-II in ASS and IBM (*Figure*  
117 *1E*). Such MHC pattern confirmed that myofibers are mainly exposed to IFN-I in DM, and IFN-II in IBM  
118 and ASS patients. As assessed by 3D cleared muscle imaging, MHC-II labeling colocalized with

119 dystrophin at the plasma membrane in IBM (*Figure S2A, supplemental videos*). This indicates that  
120 MHC-II is expressed at the sarcolemma of fully differentiated myofibers, making them potential  
121 targets for cytotoxic immune response<sup>20</sup>. We next looked at whether different IFN-I or -II signatures  
122 in DIMs patients were associated with specific histological muscle features. Regardless of the type of  
123 IFN signature, DIMs showed strong myofiber atrophy, as assessed by the decrease in myofiber size  
124 and fibrosis in DM, ASS and IBM (*Figure 1F-I*). However, only IBM muscles displayed adipocytes  
125 muscle invasion (*Figure 1J*).

126

### 127 **Systemic elevation of IFN $\gamma$ induces IBM-like features in regenerating wild-type muscles**

128 IFN $\gamma$  is a labile cytokine with a short half-life *in vivo*<sup>21,22</sup>. To investigate the link between IFN $\gamma$  and IBM  
129 pathophysiology, we implanted a subcutaneous osmotic pump releasing continuous recombinant  
130 mouse IFN $\gamma$  in wild-type mice for 14 days. Prior to IFN $\gamma$  delivery, *Tibialis Anterior* (TA) muscles were  
131 injured by BaCl<sub>2</sub> injection<sup>23</sup>. Control injured animals received osmotic pumps releasing saline solution  
132 (CTL mice) (*Figure 2A*). The efficacy of the systemic release of IFN $\gamma$  in mice was confirmed by ELISA  
133 analysis. Two weeks following mouse surgery, mice implanted with IFN $\gamma$ -containing pumps showed a  
134 5-fold increase of IFN $\gamma$  compared to saline-containing CTL mice (*Figure 2B*). The IFN $\gamma$  concentration  
135 reached in IFN $\gamma$  mice was clinically relevant since it is comparable to the serum IFN $\gamma$  level obtained in  
136 patients with infectious disease<sup>24</sup>. Increased systemic levels of IFN $\gamma$  in mice were associated with a  
137 significant increase in muscle *Ccl1a* and *mhc-II* transcripts (*Figure 2C, D*) and MHC-II protein  
138 expression in the muscle at 7 days (*data not shown*) and 14 days post-injury (*Figure 2C, D*). At 14  
139 days, MHC-II protein expression was localized at the sarcolemma in IFN $\gamma$  mice, as in IBM patients  
140 (*Figure S2A*). IBM is associated with macrophage inflammatory infiltrates into the muscle. Since IFN $\gamma$   
141 promotes macrophage polarization and activates pro-inflammatory phenotype (M1)<sup>12</sup>, we thus  
142 explored the extent of macrophage infiltrates in IFN $\gamma$  mice. Higher CD68+ macrophage density was  
143 observed in muscle from IFN $\gamma$  mice. We found an increased expression of *iNos*, and *TGF $\beta$*  expression  
144 in IFN $\gamma$  mice muscles (*Figure 2F, G*), both transcripts being characteristic of M1 and M2 polarization,

145 respectively. Macrophages and more specifically M2 subtypes are a strong producer of TGF $\beta$ , which  
146 is involved in muscle fibrosis<sup>25</sup>. Indeed, fibrosis was increased in IFN $\gamma$  mice compared to CTL mice  
147 (*Figure 2H-K*). Hence, the muscular content of adipocytes was increased in IFN $\gamma$  mice compared to  
148 CTL mice at 14 days post-injury (*Figure 2J*).

149 Altogether, our data showed that continuous high levels of circulating IFN $\gamma$  triggers the IFN $\gamma$ -  
150 signature in injured muscles, with increased macrophage infiltrate, endomysial fibrosis, and adipose  
151 involution, mimicking most of the molecular and cellular features previously observed in IBM muscle  
152 (*Figure 1*).

153

#### 154 **Systemic elevation of IFN $\gamma$ delays myofiber regeneration in mice**

155 Next, we sought to identify the mechanisms of action underlying the deleterious effect of IFN $\gamma$  in  
156 IBM. IFN $\gamma$  is a potent pro-inflammatory cytokine secreted by M1 macrophages, which are known to  
157 delay the kinetics of muscle differentiation<sup>26</sup>. Then, we examined whether the upregulation of the  
158 IFN-II signature affects myogenesis *in vivo* (*Figures 3A*). The number of regenerating embryonic  
159 MyHC-positive (eMHC+) myofibers in IFN $\gamma$  and CTL mice was monitored. eMHC protein is typically  
160 expressed from 2-3 days post-injury, then completely cease to be expressed between 7 and 14  
161 days<sup>27</sup>. Although we did not observe a difference at day 7, there was a significant increase of the  
162 density of eMHC+ fibers in TAs of mice treated with IFN $\gamma$  at day 14 (*Figure 3B, C*). This phenotype was  
163 associated with a reduction of regenerating TA muscle weight (*Figure 3D*) and myofiber size (*Figure*  
164 *3E*) in IFN $\gamma$  mice. In contrast, non-injured *Gastrocnemius* muscle did not show any change in myofiber  
165 size under systemic IFN $\gamma$  delivery (*data not shown*), indicating that the observed atrophic phenotype  
166 of TA muscle was linked to the phenomenon of post-lesional repair. While multi-nucleated fibers  
167 were present abundantly in CTL mice, the number of centralized nuclei per fiber was significantly  
168 decreased at 14 days post-injury in IFN $\gamma$ -exposed regenerating TAs (*Figure 3F*), indicating an overall  
169 alteration of myoblastic cell fusion to growing regenerating myofibers under systemic IFN $\gamma$  exposure.  
170 We next examined whether sustained IFN $\gamma$  release affect myogenic properties of muscle satellite



171 cells (MuSCs), which are known to trigger muscle repair. Indeed, IFN $\gamma$  promotes the classical  
172 activation of macrophages, which delay myogenesis by extending the proliferative period of  
173 myoblasts before they enter myogenic differentiation<sup>26,28</sup>. However, seven days post-injury, the  
174 density of PAX7<sup>+</sup> cells (*Figure 3G, H*) as well as the proportion of proliferating PAX7<sup>+</sup>KI67<sup>+</sup> cells  
175 (*Figure 3H*) was decreased in regenerating TAs of IFN $\gamma$  mice, not suggesting a central role for IFN $\gamma$ -  
176 induced M1 activation in post-injury muscle atrophy. Thus, systemic IFN $\gamma$  stress triggers sporadic and  
177 muscle-specific loss of MuSC density and function, participating muscle repair delay.

### 178 **IFN $\gamma$ directly repress the proliferation, activation and fusion of myogenic cells**

179 To directly address the impact of increased IFN $\gamma$  levels on the myogenic capacities of MuSCs, we  
180 exposed human muscle progenitor cells (MPCs) to IFN $\gamma$  ( $2 \times 10^3$  U/mL) (*Figure 4A*). MPCs were isolated  
181 and purified from CTL human deltoid muscles, as previously described<sup>29</sup>. After 72h, IFN $\gamma$ -exposed  
182 MPCs expanded less in culture than CTL MPCs (*Figure 4B*). This reduced proliferation was confirmed  
183 using the Ki67 proliferation marker that showed a decrease of Ki67 expression in IFN $\gamma$ -treated MPCs  
184 at the mRNA (*Figure S3A*) and protein level (*Figure 4C, D*) up to 10 days of exposure. Of note, the  
185 decrease of cell proliferation, also illustrated by a decrease in ATP content (*Figure S3B*), was not due  
186 to cell death since IFN $\gamma$  binding did not increase the plasma membrane permeability (*Figure S3C*).  
187 Besides proliferation, IFN $\gamma$  also inhibited the migration capacity of MPCs *in vitro*, as evaluated by the  
188 scratch test after 48h of exposure (*Figure S3 D, E*). Moreover, the capacity of MPCs to activate *in vitro*  
189 was inhibited by IFN $\gamma$ , as assessed by the reduced number of PAX7<sup>+</sup> MYOD<sup>+</sup> cells (*Figure 4E*). To  
190 further characterize the direct impact of IFN $\gamma$  exposure on MuSC fate, we performed complementary  
191 experiments using *ex vivo* floating murine myofibers that offer the advantage to retain MuSCs within  
192 their niche<sup>30</sup>. Using this method, we confirmed that *in vitro* IFN $\gamma$  exposure decreased the percentage  
193 of activated Pax7<sup>+</sup> MYOD<sup>+</sup> cells towards an increase of Pax7<sup>+</sup> MYOD<sup>-</sup> self-renewing cells after 48h  
194 (*Figure 4F*). In human MPCs, the decreased activation upon IFN $\gamma$  stimulation was accompanied by a  
195 decrease in the mRNA level of myogenic differentiation markers, *Myogenin (MyoG)* and *Myf6* (*Figure*

196 *S3F*), demonstrating an overall impairment of both the activation and differentiation potential of  
197 myogenic progenitors by IFN $\gamma$ .

198 To decipher whether sustained IFN $\gamma$  delivery induces muscle atrophy *in vivo* by impairing muscle  
199 progenitor differentiation solely or by impacting also the fusogenic capacity of myogenic progenitors,  
200 we exposed human MPCs in differentiation medium for 96 hours at low density to synchronize them  
201 in a differentiated state (mainly, MYOD<sup>+</sup> and MYOG<sup>+</sup> cells) (*Figure 4G*). Then, differentiated  
202 MYOD<sup>+</sup>MYOG<sup>+</sup> cells were split and seeded at high density to allow them to fuse. Using this strategy,  
203 we showed that IFN $\gamma$  exposure decreased in differentiated MPCs the transcript level of *Myomaker*  
204 and *Myomerger* (*Figure 4H*), the two main fusogenic proteins. As a consequence, the fusion index of  
205 MPCs was strongly decreased upon IFN $\gamma$  treatment (*Figure 4I, J*) and IFN $\gamma$ -exposed MPCs formed  
206 fewer and smaller myotubes (*Figure 4K*) compared to CTL MPCs. Overall, these results witnessed that  
207 chronic IFN $\gamma$  exposure slows down the differentiation as well as the fusion capacity of myogenic  
208 progenitors, participating in the atrophic muscle fiber phenotype observed in injured and IBM  
209 muscles *in vivo*.

210

### 211 **Elevated IFN $\gamma$ level increases premature cellular senescence**

212 Replicative senescence is associated with impaired differentiation capacity of human myogenic  
213 progenitor cells<sup>31,32</sup>. Since IFN $\gamma$  induces cell senescence in many cell types<sup>33,34</sup>, we examined whether  
214 chronic IFN $\gamma$  exposure may trigger premature senescence of myogenic progenitors *in vitro* and *in*  
215 *vivo*. Treatment of human MPCs with IFN $\gamma$  led to senescent-associated morphological changes,  
216 including a typical flat and enlarged cellular shape as compared to CTL MPCs (*Figure 5A,B*). Using  
217 busulfan as a positive control for senescence induction<sup>35</sup>, we observed similar levels of SA $\beta$ Gal-  
218 positive cells in IFN $\gamma$ - and busulfan-treated MPCs (*Figure 5D,E*). Interestingly, IFN $\gamma$ -exposed MPCs  
219 showed an increase of *p16* mRNA level (*Figure 5C*) and SA $\beta$ Gal staining (*Figure 5D,E*), two  
220 senescence-associated markers<sup>36</sup>. To verify whether IFN $\gamma$  signature is also associated with cell  
221 senescence in pathology, we investigate whether MHC-II+ MPCs isolated from IBM/ASS patients with

222 high IFN-II signature showed evidence of premature senescence compared to CTL MPCs (*Figure 5G-*  
223 *K*). We found that the MPCs from MHC-II<sup>+</sup> muscles proliferated less rapidly than CTL MPCs, as  
224 evaluated by the decrease in the cell doubling time all along the passages (*Figure 5F, G*). *In vivo*, the  
225 ratio of PAX7<sup>+</sup>Ki67<sup>+</sup> myogenic progenitors was lower in IBM than in other DIMs muscles (*Figure 5H, I*),  
226 suggesting that the proliferative capacity of MPCs in IBM muscles is reduced. The decreased  
227 proliferation of muscle stem cells in IBM, associated with an upregulation of *p16* transcripts (*Figure*  
228 *5J*) and senescence-associated pathways (*Figure 5K*).

229 Together, these data confirm muscle stem cell dysfunction in IBM patients associated with  
230 premature cellular senescence, impaired regenerative capacity, and abnormal muscle overexpression  
231 of IFN $\gamma$ .

232

### 233 **The deleterious effects of IFN $\gamma$ on myogenic cells are mediated by JAK-STAT activation**

234 IFN $\gamma$  triggers immune responses through activation of JAK1/2 receptor and induction of STAT1  
235 phosphorylation that activates MHC-II expression on the cell surface via the CIITA transactivator<sup>10,11</sup>.

236 We thus evaluated whether IFN $\gamma$  controls MHC-II expression in MPCs through JAK-STAT signaling. By  
237 western-blot analysis, we showed that IFN $\gamma$  increased in human MPCs the activation of JAK-STAT  
238 pathway, as assessed by the increased expression of both STAT1 protein and its phosphorylated form  
239 after 6 days of IFN $\gamma$  exposure (*Figure 6A, B*). This result correlated the transcriptomic studies  
240 performed in IBM muscles, showing an upregulation of STAT1 and its downstream target genes  
241 (CIITA, HLA-DR, -DO) (*Figure S1C*). Activation of the JAK-STAT pathway under IFN $\gamma$  was confirmed by  
242 the parallel increase of *Ciita* transactivator and *Mhc-II* gene expressions in human IFN $\gamma$ -treated MPCs  
243 (*Figure 6C*). As expected, overexpression of MHC-II protein under IFN $\gamma$  was located mainly at the  
244 surface of human MPCs, whatever their myogenic state, *i.e.*, myoblast, myocytes and myotubes (*data*  
245 *not shown*).

246 We then analyzed whether the activation of the JAK-STAT pathway is responsible for the deleterious  
247 effects of IFN $\gamma$  on myogenic cell functions. For this purpose, human MPCs were treated with IFN $\gamma$  in

248 the presence or absence of a specific JAK1/2 inhibitor, ruxolitinib (*Rux*), in comparison with butylated  
249 hydroxyanisole (BHA) a molecule which being able to block reactive oxygen species (ROS)-mediated  
250 senescence. Ruxolitinib treatment completely abolished IFN $\gamma$ -mediated MHC-II expression (*Figure*  
251 *6D*) and rescued the inhibitory effects of IFN $\gamma$  on the proliferation (*Figure 6E*), the activation (*Figure*  
252 *6F*) and the premature senescence (*Figure 6G*) of human MPCs, as assessed by the ratio of  
253 proliferating DESMIN<sup>+</sup>KI67<sup>+</sup>, activated PAX7<sup>+</sup>MYOD<sup>+</sup> and  $\beta$ GAL<sup>+</sup> cells, respectively. BHA did not  
254 prevent the repressive effect of IFN $\gamma$  on myoblasts proliferation, indicating that this effect did not  
255 depend on ROS production. Our data therefore demonstrate that IFN $\gamma$  alters the myogenic function  
256 of human MPCs *in vitro*, via the activation of JAK-STAT signaling.

257

#### 258 **JAK-STAT inhibitor reverses the deleterious effects of IFN $\gamma$ on muscle regeneration**

259 To determine whether JAK1/2 inhibitor can prevent IFN $\gamma$ -mediated muscle lesions in injured muscles  
260 *in vivo*, we treated injured mice with either ruxolitinib (9.6 mg/kg/day) or solvent (controls, CTL), by  
261 oral gavage twice daily for 14 days (*Figure 6H*). Ruxolitinib treatment did not affect the serum  
262 concentrations of IFN $\gamma$  (*Figure 6I*). In contrast, ruxolitinib significantly reduced the expression of  
263 muscle MHC-II, confirming the efficacy of the treatment to antagonize JAK1/2 signaling and the IFN $\gamma$   
264 signaling activation *in vivo* (*Figure 6J*). Importantly, we showed that ruxolitinib did not affect muscle  
265 repair in CTL mice but specifically restored muscle regeneration capacity in IFN $\gamma$ -exposed mice  
266 (*Figure 6J-N*). Indeed, ruxolitinib-treated IFN $\gamma$  mice showed similar TA muscle weight and myofiber  
267 size compared to CTL mice (*Figure 6K-L*). In line with these results, the expression of *Murf1* atrogene  
268 was increased in IFN $\gamma$  mice compared to CTL and decreased with ruxolitinib treatment (*Figure 6M*).  
269 Furthermore, ruxolitinib significantly decreased *Col1A1* and *TGF $\beta$*  gene expressions in IFN $\gamma$  mice  
270 which are markers for developing fibrosis (*Figure 6N*). Our results, therefore, demonstrated that high  
271 IFN $\gamma$  level exerts deleterious effects on regenerating muscles *in vivo* involving muscle atrophy and  
272 fibrosis via the JAK-STAT signaling pathway. These properties were antagonized *in vivo* by the  
273 ruxolitinib.



## 275 Discussion

276 IBM is an idiopathic and slowly progressing disease affecting muscle function, which does not benefit  
277 from well-admitted animal models to investigate its pathogenesis<sup>1,37</sup>. Typical histological features  
278 associate myonecrosis, protein aggregates within myofibers, and endomysial inflammation. We  
279 confirmed that DIM strikingly differ according to their IFN signatures. IFN-I signature is the highest in  
280 DM, and IFN-II in ASS and IBM, IBM and ASS displaying similar levels of IFN-I/II-stimulated genes. Our  
281 results highlight the importance of gene selection to qualify IFN signatures which may explain  
282 discrepancies that can be noted between studies<sup>7,38</sup>. The MHC-II expression was also characterized at  
283 the protein level by immunohistochemistry and clearing method that confirmed the localization of  
284 MHC-II protein at the sarcolemma and therefore the myofiber response to IFN $\gamma$ .

285 In IBM, the combination of a very long and slow course of the disease with the presence of IFN $\gamma$ -  
286 secreting CD8 T-cells in endomysium, necessarily leads to a strong and sustained exposure of  
287 myofibers to IFN $\gamma$ , without commensurate with what is observed in other DIMs, and makes plausible  
288 the direct implication of IFN $\gamma$  in myofiber alterations. In IFN $\gamma$  mice, myofibers abnormally express  
289 MHC-II expression. In case of muscle injury, increased circulating IFN $\gamma$  was associated with delayed  
290 repair, endomysial fibrosis and adipocyte accumulation. These muscle damages are in line with the  
291 typical histological characteristics of IBM muscles. These data are reminiscent of the cardiomyopathy  
292 developed in SAP-IFN- $\gamma$ 5 mice, with atrophy and fibrosis<sup>39</sup>. A typical hallmark of IBM muscle is the  
293 presence of amyloid depositions that we did not observe in IFN $\gamma$  mice. Interestingly, the culture of  
294 myoblasts in the presence of IFN $\gamma$  and IL1 $\beta$  for 48 hours is accompanied by the formation of amyloid  
295 aggregates<sup>40</sup>. Our RNAseq analysis showed an upregulation of others proinflammatory cytokines in  
296 IBM muscles. It is possible that a synergic effect of proinflammatory cytokines in muscle could be  
297 promote muscle IBM-like features, such as amyloid deposits.

298 The uninjured muscles showed neither MHC-II positive myofibers, atrophy nor fibrosis (*data not*  
299 *shown*), suggesting that the development of IBM requires the combination of repeated muscle  
300 injuries with deregulated immune response, leading to protracted release of IFN $\gamma$  in the vicinity of

301 myofibers, and secondary to the occurrence of degenerative changes. These data are in line with  
302 results obtained using SAP-IFN- $\gamma$ 5, since authors did not observe a pathogenic phenotype in  
303 uninjured quadriceps muscle<sup>39</sup>. In case of muscle injury, systemic elevation of IFN $\gamma$  was also  
304 associated with an increase of macrophage population. This increase likely corresponds to the post-  
305 myonecrosis recruitment of macrophages and reflects the delay in muscle regeneration of IFN $\gamma$  mice.  
306 This cytokine is able to stimulate M1 macrophages and favor the proliferation of myoblasts<sup>41</sup>.  
307 However, our data showed that IFN $\gamma$  directly impairs satellite cell proliferation and differentiation,  
308 and promotes myofiber atrophy *in vivo*. The systemic elevation of IFN $\gamma$  increased fibrosis and  
309 adipocyte accumulation in mice muscle, both features being characteristic of the fibroadipogenic  
310 involution process observed in chronically diseased muscles. Finally, our results showed that, as  
311 much a transient increase of IFN $\gamma$  and activation of M1 macrophages is necessary for myofiber  
312 regeneration, as much the protracted increase of IFN $\gamma$  in myofiber microenvironment is profoundly  
313 deleterious for muscle tissue repair.

314 IFN $\gamma$  signaling leads to the induction of CIITA transactivator, which combines with promoters to  
315 launch MHC-II expression<sup>42</sup>. In the murine myogenic cell line C2C12, CIITA represses myogenesis by  
316 inhibiting myogenin<sup>43,44</sup>. We also showed that IFN $\gamma$  stimulation induces the myogenic cells  
317 senescence in addition to myogenesis repression. In accordance with these experimental findings, we  
318 showed that MPCs from muscles with strong myofiber expression of MHC-II proliferated less rapidly  
319 than those from non-diseased muscles, regardless of IFN $\gamma$  presence in the culture medium, indicating  
320 a long-term effect of IFN $\gamma$  on MPC growth capacity. Likewise, the proportion of proliferating satellite  
321 cells in muscle biopsy samples from IBM patients was lower than in DM patients. Transcriptomic  
322 analysis confirmed the senescence pathway activation in IBM muscle. IBM is also characterized by a  
323 defect in the functionality of satellite cells. Thus, our data suggest that IFN $\gamma$  could mediate  
324 senescence activation through p16 in IBM muscle. Multiple stimuli are able to induce senescence,  
325 which is regulated mainly by the tumor suppressors p16, p53, Rb, as well as the cyclin-dependent

326 kinase inhibitors<sup>45</sup>. Inflammatory stimuli such as TNF $\alpha$  binding has been shown to up-regulate IFN $\gamma$   
327 signature and mediate STAT1-mediated senescence in HUVEC cells<sup>46</sup>.  
328 Transcriptomic studies also showed activation of the STAT1 pathway, with increased STAT1 and its  
329 phosphorylated form (P-STAT1) in IBM patients. Therefore, we aimed at determining the relevance of  
330 using JAK/STAT inhibitors to repress the deleterious effect of chronic IFN $\gamma$  up-regulation in  
331 regenerating muscles. Ruxolitinib is an oral inhibitor of the JAK-STAT pathway and is already tested in  
332 clinics to prevent IFN type I dependent cytotoxicity<sup>47-49</sup>. In our hands, the pharmacological inhibition  
333 of JAK1/2 completely blocked the IFN $\gamma$  signaling pathway in MPCs, reflected by MHC-II and CIITA  
334 expression and restored their normal proliferation and activation upon IFN $\gamma$  exposure *in vitro*.  
335 Interestingly, it was shown that the reduction of muscle regenerative capacities and satellite cell  
336 senescence in aged mice was associated with the upregulation of JAK-STAT signaling targets. In  
337 addition, the pharmacological inhibition of Jak2 or Stat3 stimulates satellite stem cell divisions and  
338 enhances the repopulation of the satellite cell niche<sup>50</sup> supporting the potential therapeutical interest  
339 of JAK inhibition in IBM.  
340 *In vivo*, we validated the effects of Ruxolitinib on muscle phenotype developed in IFN $\gamma$ -treated mice.  
341 Ruxolitinib dosage (9.6 mg/kg/day), was largely below what is used to cancer treatment in mice  
342 (50mg/kg/day) cancer<sup>51</sup>, suggesting that our findings might be of use for preclinical studies. IFN $\gamma$ -  
343 induced muscle atrophy was rescued by Ruxolitinib treatment, which also dampened the expression  
344 of fibrosis markers Col1A1, and TGF $\beta$ . Thus, targeting JAK1/2 can prevent major deleterious effects of  
345 IFN $\gamma$  on muscle without generating any obvious adverse effects<sup>49</sup>.  
346 Recently, a clinical assay showed some beneficial effects of rapamycin, mTOR pathway inhibitor in  
347 IBM patients<sup>52</sup>. Our RNA sequencing analysis indicated a downregulation of mTOR signaling pathway  
348 (*Figure S1D*) and specifically the number of mTOR transcript is unchanged between CTL and IBM  
349 muscles (*Figure S1E*), suggesting that mTOR pathway regulation is not directly involved in IBM.  
350 Moreover, it must be noted that muscle-specific mTOR knock-out mice present severe myopathy<sup>53</sup>



351 and muscular adverse effects of long-term rapamycin treatment have been reported in transplanted  
352 patients<sup>54</sup>.

353 In conclusion, our data extended the characterization of IBM pathogenesis with a decrease in the  
354 regenerative capacities of muscle satellite cells, and that the up-regulation of IFN $\gamma$  signaling is one of  
355 hallmark in IBM pathogenesis. Ectopic IFN $\gamma$  overexpression recapitulates typical histological feature  
356 of IBM muscles such as myofiber atrophy, fibrosis, adipocytes invasion and cell senescence by  
357 activating the JAK/STAT pathway. Moreover, we provided experimental evidence supporting the  
358 efficiency of the JAK/STAT inhibitor ruxolitinib to counteract the deleterious effect of IFN $\gamma$  in  
359 interferonopathies affecting muscle phenotype such as IBM. JAK-STAT could be a new therapeutic  
360 target, suggesting that ruxolitinib or others JAK-STAT inhibitors may be of use for IBM patients.

361

362

363 Figures legends

364 **Figure 1 IBM differs from other DIMs by its highest muscular IFN $\gamma$  signature**

365 **(A)** Gene ontology analysis for biological processes of the upregulated (red) genes in Inclusion  
366 body myositis (IBM) muscle compared to control (CTL) muscles. Selected enriched terms are  
367 presented according to the fold enrichment.

368 **(B)** Heatmap pathway IFN-II with the normalized reads per gene of CTL (n=5), Dermatomyositis  
369 (DM, n=5), Anti-synthetase syndrome (ASS, n=5) and IBM (n=4) RNA-seq data.

370 **(C)** Quantification of *Ifn $\gamma$*  and *Hla-Dr (Mhc-II)* genes expression by RT-qPCR between DM (n=10),  
371 ASS (n=9), IBM (n=9) and CTL (n=10) muscles. Mann-Whitney U test, means  $\pm$  SEM.

372 **(D)** Positive correlation between *Hla-Dr* and *Ifn $\gamma$*  gene expressions in IBM and ASS muscles.  
373 Pearson's correlation method.

374 **(E)** Representative immunohistochemistry images showing MHC-I (top panel), and MHC-II  
375 staining (bottom panel) in IBM, ASS, DM and CTL muscles of our patient cohort with  
376 peroxidase (HRP)-conjugated polyclonal antibody).

377 **(F)** Myofiber size analyses based on laminin immunostaining and automated analysis, as  
378 previously described<sup>55</sup>.

379 **(G)** Cross-section-area (CSA) mean quantification in CTL (n=7), DM (n=9), ASS (n=6) and IBM  
380 (n=4) muscles. These myopathies are defined by myofibers atrophy, perifascicular in DM, and  
381 general in IBM. Means  $\pm$  SEM, One-way ANOVA, Tukey's multiple comparison.

382 **(H)** Representative images of collagen deposit by Sirius Red staining (*left*) and quantification of  
383 the percentage of connective tissue area (*right*) performed CTL (n=5), DM (n=4), ASS (n=6)  
384 and IBM (n=8) muscles. Means  $\pm$  SEM, One-way ANOVA, Tukey's multiple comparison.

385 **(I)** Quantification of adipocytes invasion performed on muscle sections from CTL (n=7), DM  
386 (n=7), ASS (n=7) and IBM patient (n=10). Means  $\pm$  SEM. Mann-Whitney U test.

387

388 **Figure 2 Systemic elevation of IFN $\gamma$  delays myofiber regeneration in mice**

389 **(A)** Experimental design.

390 **(B)** Quantification of IFN $\gamma$  concentration in the serum of IFN $\gamma$  (n=8) and CTL (n=7) mice  
391 performed by ELISA assay, 14 days post-injury. Mann-Whitney U test, means  $\pm$  SEM.

392 **(C)** Quantification of *Clta* (*left*) and *Mhc-II* (*right*) gene expression by RT-qPCR performed on  
393 Tibialis Anterior (TA) injured muscles from IFN $\gamma$  (n=8) and CTL mice (n=8), 14 days post-injury.  
394 Mann-Whitney U test, means  $\pm$  SEM.

395 **(D)** Representative immunofluorescence images of LAMIMIN (white), MHC-II (red), and nuclei  
396 (DAPI, blue) performed on IFN $\gamma$  and CTL injured TAs, 14 days post-injury.

397 **(E)** Representative immunofluorescence images of LAMININ (green), CD68 (red), and nuclei  
398 (DAPI, blue) performed on IFN $\gamma$  and CTL injured TAs, 14 days post-injury.

399 **(F)** Quantification of the percentage of CD68+ macrophages per area performed on IFN $\gamma$  (n=7)  
400 and CTL (n=8) injured TAs, 14 days post-injury. Mann-Whitney U test, mean $\pm$  SEM.

401 **(G)** Quantification of *Inos* (*left*) and *Tgf $\beta$*  (*right*) gene expression performed by RT-qPCR  
402 performed on IFN $\gamma$  (n=7) and CTL (n=8) injured TAs, 14 days post-injury. Mann-Whitney U  
403 test, means  $\pm$  SEM.

404 **(H)** Representative images of collagen deposit by Sirius Red staining (*left*) and quantification of  
405 the percentage of connective tissue area (*right*) performed on injured TAs from IFN $\gamma$  and CTL  
406 mice, 14 days post-injury. Mann-Whitney U test, means  $\pm$  SEM.

407 **(I)** Representative images of Hematoxilin eosin staining (*left*) and quantification of the  
408 percentage of adipocytes invasion by bodipy staining (*right*) performed on injured TAs from  
409 IFN $\gamma$  (n=7) and CTL (n=6) mice, 14 days post-injury. Mann-Whitney U test, means  $\pm$  SEM.

410

411 **Figure 3 Systemic elevation of IFN $\gamma$  delays myofiber regeneration in mice**

412 **(A)** Experimental design.

413 **(B)** Representative immunofluorescence images of LAMIMIN (green), embryonic isoform of  
414 myosin heavy chain, eMHC (red), and nuclei (DAPI, blue) performed on IFN $\gamma$  and CTL injured  
415 TAs, 14 days post-injury.

416 **(C)** Quantification of the percentage of eMHC+ fibers per area performed on IFN $\gamma$  (n=8) and CTL  
417 (n=8) injured TAs, 14 days post-injury. Mann-Whitney U test, mean $\pm$  SEM.

418 **(D)** Quantification of TA muscle mass quantification per body weight at 14 days post-injury in  
419 IFN $\gamma$  (n=14) and CTL (n=14) mice, 14 days post-injury. Mann-Whitney U test, means  $\pm$  SEM.

420 **(E)** Myofiber size analyses based on laminin immunostaining and automated analysis, as  
421 previously described<sup>55</sup> (left), minor diameter, and cross-section-area (CSA) quantifications  
422 performed on IFN $\gamma$  (n=8) and CTL (n=8) injured TAs. Mann-Whitney U test, means  $\pm$  SEM.

423 **(F)** Quantification of nuclei number by centronuclear fibers per area performed on IFN $\gamma$  (n=7)  
424 and CTL (n=6) injured TAs, 14 days post-injury. Two-Way ANOVA, Sidak's multiple  
425 comparison.

426 **(G)** Representative immunofluorescence images of PAX7 (red), proliferating marker KI67 (green),  
427 and nuclei (DAPI, blue) performed on IFN $\gamma$  and CTL injured TAs, 7 days post-injury.

428 **(H)** Quantification of PAX7+ cells per 100 fibers (left) and percentage of proliferating MuSC  
429 PAX7+ Ki67+ per PAX7 total (right) performed on IFN $\gamma$  (n=8) and CTL (n=7) injured TAs, 7 days  
430 post-injury. Means  $\pm$  SEM, Mann-Whitney U test.

431

432 **Figure 4 IFN $\gamma$  directly repress the proliferation, activation and fusion of myogenic cells**

433 **(A)** Experimental design for *in vitro* studies (n=4).

434 **(B)** Human myogenic progenitor cells (MPC) growth curve, exposed or not to IFN $\gamma$  for 72h. Two  
435 way-ANOVA, Sidak's multiple comparisons test.

436 **(C)** Immunofluorescence staining of DESMIN (green), Ki67 (pink), and nuclei (DAPI, blue) in CTL  
437 and IFN $\gamma$  exposed-MPC.

438 **(D)** Quantification of proliferating DESMIN+ Ki67+ MPCs percentage, at 3 and 10 days. Means  $\pm$   
439 SEM Mann-Whitney U t test.

440 **(E)** Immunofluorescence staining of MYOD (green), PAX7 (red), and nuclei (DAPI, blue) (*left*) and  
441 PAX7+ MYOD+ cell (*right*) percentage performed on CTL and IFN $\gamma$  exposed-MPC, at 72 hours.  
442 Mann-Whitney U test, means  $\pm$  SEM.

443 **(F)** Immunofluorescence staining of PAX7 (green), MYOD (red), and nuclei (DAPI, blue) (*left*) and  
444 quantification of the of PAX7+ MYOD+ cells and PAX7+ MYOD-(*right*) percentages performed  
445 on floating murine myofibers, exposed or not to IFN $\gamma$  for 48hours. Mann-Whitney U test,  
446 means  $\pm$  SEM.

447 **(G)** Experimental design for the differentiation and fusion studies.

448 **(H)** Quantification of *myomaker* (up) and *minion* (bottom) fusogene expression by RT-qPCR  
449 performed on CTL and IFN $\gamma$  exposed-MPCs, at 96 hours. Mann-Whitney U test, means  $\pm$  SEM.

450 **(I)** Immunofluorescence staining of MyHC (green) and nuclei (DAPI, blue) performed on CTL and  
451 IFN $\gamma$  exposed-myocytes and myotubes, for 96 hours.

452 **(J)** Fusion index of synchronized CTL and IFN $\gamma$  exposed-MPCs after 96h of differentiation. Mann-  
453 Whitney U test, means  $\pm$  SEM.

454 **(K)** Quantification of myotubes size, number of nuclei per MyHC positive cells. Mann-Whitney U  
455 test, means  $\pm$  SEM.

456

457 **Figure 5 Elevated IFN $\gamma$  level increases premature cellular senescence**

458 **(A)** Experimental design (n=4 independent experiments per condition)

459 **(B)** Representative immunofluorescence images of DESMIN (red), KI67 (green) and nuclei (DAPI,  
460 blue) performed on MPCs exposed or not to IFN $\gamma$  for 72 hours and 10 days.

461 **(C)** Quantification of *p16* gene expression by RT-qPCR performed on CTL and IFN $\gamma$  exposed-  
462 MPCs, at 72 hours and 10 days. Mann-Whitney U test, means  $\pm$  SEM.

463 **(D)** Representative images of SA $\beta$ Gal staining performed on MPCs, exposed or not to IFN $\gamma$  for 10  
464 days.

465 **(E)** Quantification of SA $\beta$ Gal positive cells at 10 days in CTL, IFN $\gamma$  and Busulfan (positive control  
466 of senescence) conditions. Means  $\pm$  SEM, Unpaired T-test.

467 **(F)** Experimental design obtain purified CD56+ MPCs from healthy donor and MHC-II+ muscle  
468 from IBM/ASS patients.

469 **(G)** Quantification of the doubling time (day) for several passages of MPCs from healthy donor  
470 (CTL) and muscle with strong myofiber MHC-II expression (MHC-II+). Two-way ANOVA,  
471 Sidak's multiple comparison

472 **(H)** Representative immunofluorescence images of PAX7 (red), proliferating marker KI67 (green),  
473 and nuclei (DAPI, blue) performed on CTL, DM, ASS and IBM muscle sections.

474 **(I)** Quantification of the percentage of proliferating MuSCs PAX7+ KI67+ cells. Means  $\pm$  SEM.  
475 Mann-Whitney U test.

476 **(J)** Quantification of *p16* gene expression by RT-qPCR performed on CTL (n=3), DM (n=4), ASS  
477 (n=5) and IBM (n=6) muscle. Means  $\pm$  SEM, Unpaired T-test.

478 **(K)** Heatmap senescence pathway with the normalized reads per gene of CTL (n=5), DM (n=5),  
479 ASS (n=5) and IBM (n=4) RNA-seq data.

480

481 **Figure 6**

- 482 **(A)** Immuno blot for Phospho-STAT1, STAT1 and  $\beta$ Tubulin (left); human MPCs after 6 days of  
483 culture  $\pm$  IFN $\gamma$  exposure (n=5). Uncropped blots in Source Data.
- 484 **(B)** STAT1 and Phospho-STAT1 signal intensity. Means  $\pm$  SEM, Mann-Whitney U test.
- 485 **(C)** *Ccl1a* (left) and *Hla-Dr* (right) gene expressions in human CTL and IFN $\gamma$ -exposed MPCs for 6  
486 days (n=4). Means  $\pm$  SEM Mann-Whitney U test.
- 487 **(D)** Immunofluorescence staining (left) of MHC-II (red), and nuclei (DAPI, blue) in CTL, IFN $\gamma$ -  
488 exposed MPC and with or without specific inhibitors, Ruxolitinib anti JAK-STAT1, BHA anti-  
489 oxydative stress. MHC-II+ cells (right) quantification at 72 hours. One-way ANOVA, Dunn's  
490 multiple comparison.
- 491 **(E)** Immunofluorescence staining (left) of DESMIN (red), KI67 (green) and nuclei (DAPI, blue) in  
492 CTL, IFN $\gamma$ -exposed MPC and IFN $\gamma$ -exposed MPC with ruxolitinib treatment at 72h. KI67+  
493 DESMIN+ MPCs quantification at 72 hours (right). Means  $\pm$  SEM Mann-Whitney U test.
- 494 **(F)** Immunofluorescence staining (left) of PAX7 (red), MYOD (green) and nuclei (DAPI, blue) in  
495 CTL MPCs, IFN $\gamma$ -exposed MPCs and IFN $\gamma$ -exposed MPCs with ruxolitinib treatment at 72h.  
496 Pax7+ MyoD+ quantification at 72 hours. Means  $\pm$  SEM Mann-Whitney U test.
- 497 **(G)** SA $\beta$ Gal positive cells quantification at 5 days in CTL MPCs, IFN $\gamma$ -exposed MPCs and IFN $\gamma$ -  
498 exposed MPCs with ruxolitinib. Means  $\pm$  SEM Mann-Whitney U test.
- 499 **(H)** Experimental design of *in vivo* studies, 4 groups of transplanted wild-type mice with  
500 subcutaneous osmotic pump releasing IFN $\gamma$  or NaCl for 14 days. Groups received ruxolitinib  
501 (Rux) or solvent by oral gavage twice daily for 14 days.
- 502 **(I)** Serum IFN $\gamma$  concentration in IFN $\gamma$  (n=8), CTL (n=7), Rux and Rux+IFN $\gamma$  mice performed by  
503 ELISA assay, 14 days post-injury. Mann-Whitney U test, means  $\pm$  SEM.
- 504 **(J)** Immunofluorescence staining of LAMININ (white), MHC-II (red), and nuclei (DAPI, blue) in CTL  
505 and IFN $\gamma$  injured TA muscle.

- 506       **(K)** TA muscle mass at 14 days post-injury in IFN $\gamma$ , CTL, Rux and Rux+IFN $\gamma$  mice (n=8 per group),  
507           14 days post-injury. Mann-Whitney U test, means  $\pm$  SEM.
- 508       **(L)** Cross-section-area (CSA) quantifications in IFN $\gamma$  (n=8), CTL (n=8), Rux and Rux+IFN $\gamma$  injured  
509           TAs. Mann-Whitney U test, means  $\pm$  SEM.
- 510       **(M)** *Murf1* atrogene expression in CTL, IFN $\gamma$ , Rux and Rux+IFN $\gamma$  injured TAs, 14 days post-injury.  
511           Means  $\pm$  SEM Mann-Whitney U test.
- 512       **(N)** *TGF $\beta$*  (left) and *Col1A1* (right) expressions in CTL, IFN $\gamma$ , Rux and Rux+IFN $\gamma$  injured TAs, 14 days  
513           post-injury. Means  $\pm$  SEM Mann-Whitney U test.
- 514



## 515 Materials and methods

### 516 Patients and muscle samples

517 Muscle samples were collected by FJA, SS and EM at Mondor hospital from patients undergoing  
518 muscle biopsy for diagnostic purposes (*Table 1*). Samples were obtained from deltoid muscles. All  
519 human specimens were collected with informed consent and procedures approved by IRB (Henri  
520 Mondor Biological Resource Platform: registration number DC-2009-930, French Ministry of  
521 Research). Muscle biopsy samples were conventionally processed for myopathology<sup>6</sup> with  
522 immunoperoxidase staining of MHC-I and MHC-II antigens, complement membrane attack complex  
523 (C5b-9), CD56/NCAM (myofiber regeneration), CD68, CD3, CD4, CD8, and CD20 (leukocyte subsets)  
524 performed on 7  $\mu$ m-cryosections (references in<sup>6</sup>). All biopsy specimens were reviewed blindly for  
525 clinical and MSA data by the FJA, SS and EM. ENMC criteria were used to diagnose dermatomyositis  
526 (DM)<sup>56</sup>, criteria published in 2014 by Lloyd et al. to diagnose inclusion body myositis (IBM)<sup>57</sup>, and  
527 Troyanov classification to diagnose overlap myositis<sup>58</sup> the ASS subset of which being defined by  
528 detection of circulating anti-synthetase auto-antibodies. Controls (CTL) were patients presenting with  
529 chronic myalgias, but no definite neuromuscular pathology after diagnostic work-up including muscle  
530 biopsy (histologically normal muscle).

531

### 532 Isolation of muscle progenitor cells from human deltoid muscle biopsy

533 Human muscles were dissociated and digested with pronase enzyme (*1.5mg/mL; protease from*  
534 *streptomyces griseus P5147-5G Sigma*) in DMEM at 37°C for 20 min and passed through a 100 mm  
535 cell strainer (repeated 4 times). Then, stopped the digestion activity by FBS (30%). Centrifugate cells  
536 supernatant 20 min at 1600 rpm. Cells were seeded onto 5 flasks coated with gelatin 5cm<sup>2</sup> in F12  
537 medium (*Life Technologies, Gibco® 31765-027*) with 20% FBS (*Dutscher; CAT S1810-500 ; lot*  
538 *S11307S1810*), 0.2% Vitamines, 1% AANE, 1% P/S and ultrosorG 1% (*Life sciences 15950-017*).

539

### 540 Muscle primary cell culture

541 After cellular amplification, the cells are sorted with CD56 microbeads (*Miltenyi, 130-050-401*) two  
542 times, the efficiency is 90-95% CD56+ cells. Human muscle progenitor cells (MPC) were cultured in  
543 F12 medium with 20% FBS, 0.2% Vitamines, 1% AANE, 1% P/S in a humidified atmosphere at 37°C  
544 and 5% CO<sub>2</sub>.

545

#### 546 **IFN $\gamma$ and Inhibitor treatments**

547 Cells were treated with human IFN $\gamma$  (*Human IFN-Y1b, 100ug, ref 130-096-484 Miltenyi*). Cells were  
548 stimulated with several IFN $\gamma$  concentration, and the majority of experiments was made with 2x10<sup>3</sup>  
549 U/mL (25ng/mL) of IFN $\gamma$ . Cells were harvested for RNA or protein at defined time points after the  
550 IFN $\gamma$  exposure. For acute exposure, IFN $\gamma$  was added just one time 24h after the seeding and the  
551 medium was not replace for 72 hours. Moreover, for sustained exposure, IFN $\gamma$  was added every day  
552 in 50% of medium for 72h or 10 days. Some experiments including Ruxolitinib (Rux), selective  
553 inhibitor of JAK1/2 (10uM) (*Invivogen*), and Butylated hydroxyanisole (BHA), anti-reactive oxygen  
554 species (100uM) exposure for 72h. At least four independent experiments were assayed for each  
555 data point.

556

#### 557 **Muscle progenitor cell proliferation**

558 For proliferation experiments, primary human MPC were seeded at 6000 cells/cm<sup>2</sup> in culture  
559 medium. Next day, the medium was changed by F12 with 10% FBS, 1% P/S supplemented with or  
560 without IFN $\gamma$  treatment during 3 or 10 days with split when muscle cells obtain 80% confluence.

561

#### 562 **Myogenic differentiation**

563 For differentiation experiments, primary human MPC were seeded at confluence density (20 000  
564 cells/cm<sup>2</sup>) in culture medium. After 2 days, when the cells confluence reached 80%, the culture  
565 medium was changed for differentiation medium (F12, 2% Horse serum, 1% P/S) supplemented with

566 or without IFN $\gamma$  treatment during 3 days. Fusion index is expressed as the ratio of the nuclei number  
567 in myocytes with two or more nuclei versus the total number of nuclei.

568

#### 569 **Senescence analysis**

570 For the positive control, cellular senescence was induced by Busulfan drug (*B2635-10G Sigma*). The  
571 cells were exposed to varying concentrations of Busulfan (50 $\mu$ M and 150  $\mu$ M) for 24 h. The cells were  
572 washed twice with PBS 1X to remove drug and reseeded in fresh medium for 5 or 10 days.

573

#### 574 **SA- $\beta$ -gal Staining**

575 Cells were fixed in a solution of PBS, 1% PFA, 0.2% glutaraldehyde for 5min at RT. Samples were  
576 washed in PBS pH7 2X 10min and incubated for 30 min in PBS pH6 and further incubated in an X-gal  
577 solution (4mM K<sub>3</sub>Fe(CN)<sub>6</sub>, 4mM K<sub>4</sub>Fe(CN)<sub>6</sub>, 2mM MgCl<sub>2</sub>, 0.02% NP-40 (Igepal) and 400 mg/ml X-gal  
578 (15520-018 Sigma) in PBS pH6, at 37 °C ON for cells and 2X24 h for sections, according to the  
579 publication from<sup>59</sup>. Samples were washed in PBS 1X, and fixed in 1% PFA 5 min for cells and 30min for  
580 sections. After washes (3 X 10 min in PBS 1X), samples were mounted in PBS, 20% glycerol.

581

#### 582 **Animals**

583 Mouse lines used in this study have been described and provided by the corresponding laboratories:  
584 C57BL/6N mice (Janvier labs) aged 8-9 week-old were used for the experiments with osmotic pumps  
585 implantations. Mice were anesthetized by isoflurane. Surgical procedures were performed under  
586 sterile conditions. Animals were handled according to national and European community guidelines,  
587 and protocols were approved by the ethics committee at the French Ministry (Project No  
588 APAFIS#26142-2020070210122646 v2).

589

#### 590 **Muscle regeneration model, IFN $\gamma$ and drug treatments**

591 8-9 weeks old C57BL/6 male mice were obtained from Janvier labs and were maintained in a  
592 pathogen-free facility at 24 °C under a 12 h/12 h light/dark cycle with free access to food and water.  
593 The mice were weighted at day 0. Injury-induced muscle regeneration was performed by BaCl<sub>2</sub>  
594 (0.6%) in TAs. Briefly, the mice were anesthetized by isoflurane and 50 $\mu$ L BaCl<sub>2</sub> 0.6% were injected in  
595 each TA (Hardy, D. et al. *PLOS ONE* **11**, e0147198 (2016). Mice received IFN $\gamma$  (6 $\mu$ g/pump; 130-105-  
596 773, Miltenyi) or NaCl (CTL mice) by subcutaneous inserted osmotic pumps (alzet; model 1002) for 2  
597 weeks. For drug treatment, ruxolitinib (Selleckchem, S1378) was dissolved in DMSO to make stock  
598 solution (60mg/mL). Ruxolitinib was diluted for oral gavage in water with 30% PEG in H<sub>2</sub>O. Each  
599 mouse received two gavage per day during 2 weeks, containing ruxolitinib (9.6 mg/kg/day) or solvent  
600 twice daily (2% DMSO, 30% PEG in H<sub>2</sub>O).

601 At 14 days after injury, mice were weighted and sacrificed by cervical dislocation while under  
602 anesthesia. Then, the following muscles (injured TA muscle, gastrocnemius and biceps non-injured)  
603 were dissected. Then, TAs, one gastrocnemius were mounted in tragacanth gum (6% in water;  
604 Sigma-Aldrich), and frozen in isopentane precooled in liquid nitrogen. Gastrocnemius, biceps muscles  
605 were frozen in liquid nitrogen for molecular biology.

606

#### 607 **ELISA**

608 Blood was obtained in intracardiac. Sera were separated by centrifugation (2500 rpm, 20 min, 10°C).  
609 Each serum was assayed for murine IFN- $\gamma$  in duplicate using an enzyme immunoassay kit (Peprotech,  
610 BGK01580).

611

#### 612 **Myofibers isolation**

613 Single myofibers were isolated from C57BL/6N mouse EDL (*extensor digitorum longus*) muscle, as  
614 previously described protocol<sup>30</sup>. Muscles were dissected and digested in a filtered solution of 0.2%  
615 collagenase (Sigma) in DMEM (1X) + GlutaMAX<sup>TM</sup>-I (Gibco 31966-021) with 1%  
616 Penicillin/Streptomycin (Gibco) for 1h30 at 37°C. After connective tissue digestion, mechanical

617 dissociation was performed to release individual myofibers that were then transferred to serum-  
618 coated Petri dishes for 20 min. Single myofibers were placed in isolation medium DMEM (1X) +  
619 GlutaMAX™-I , 20% FBS (*Foetal Bovine Serum, ref 10270 Thermo Fisher Scientific*) and 1% CEE  
620 (*Chicken Embryo Extract, CE-650-J*) with or without murine IFN $\gamma$  ( $2 \times 10^3$  U/mL) (*130-105-773,*  
621 *Miltenyi*). Four independent experiments were assayed for each data point. Then, the fibers were  
622 fixed in 4% PFA for 10 min, and washed 3 times with PBS 1X and they were stored at 4°C before  
623 immunostaining. The immunostaining was performed as described in “Immunostaining and  
624 histology” with “antibodies” described after.

625

### 626 **Immunostaining and histology**

627 For immunostaining, cells were fixed in PBS, 4% paraformaldehyde 10 min at RT, washed in PBS 1X  
628 and permeabilized with PBS 1X, 0.5% Triton X-100 10min at room temperature. After three washes in  
629 PBS 1 X, cells were blocked with Bovine Serum Albumin (BSA), 10% 30min at RT. Primary antibodies  
630 were added to cells in PBS 1X, 1% BSA for 90min at 37°C or overnight at 4°C. Cells were washed three  
631 times with PBS 1X then incubated with the secondary antibodies 1h at room temperature (RT).  
632 Before mounting with fluoromount-G (*Interchim*), cells were washed three times with PBS 1X.

633 For histology, the sections were kept at RT overnight before staining. Sections were then rehydrated  
634 in PBS 1X for 10 min and fixed in 4% paraformaldehyde for 10min at RT. Then, the slides were  
635 washed 2X 5 min in PBS 1X, permeabilized and blocked with 10% BSA and we added anti-mouse IgG  
636 Fab fragment (Jackson, 115-007-003) when it is necessary. Then, the slides were incubated with  
637 primary antibodies in a solution of PBS 1X, 0.1% BSA, ON at 4°C (*Table 2*). Sections were washed in  
638 PBS 1X, 3X 5 min and incubated with the secondary antibodies 1h at RT. Sections were washed in PBS  
639 1X, 3X5 min, and mounted with fluoromount-G (*Interchim*).

640

### 641 **Clearing method for 3D myo-angiogenesis analysis**

642 Human muscle biopsies (healthy muscle, CTL and myositis IBM/ASS) were fixed in 4% PFA for 2 hours.  
643 Then, muscles were washed three times with PBS 1X for 30 min. Microtome cutting was realized on  
644 muscle biopsies into 1 mm slices. Permeabilization was done using PBST (2% Triton X-100 in PBS)  
645 overnight at RT. Then, samples were incubated with primary antibodies anti-M-CADHERIN (R&D  
646 AF4096, 1/50), anti-DYSTROPHIN (Invitrogen PA1-21011, 1/250), and anti-MHC-II (Dako 110843-  
647 002/Clone CR3/43, 1/400) in dilution buffer (1% goat serum, 0,2% Triton-X 100, 0,2% sodium azide in  
648 PBS) for 5 days at 37°C, under agitation. Muscles were extensively washed with washing buffer (3%  
649 NaCl, 0,2% Triton X-100 in PBS). After washes, samples were incubated in secondary antibodies  
650 solution with Alexa Fluor 647-, 555-, 488- conjugated secondary antibodies (1/500, Life Technologies)  
651 for 3 days at 37°C, under agitation. Then, DAPI was added to muscle samples for 2 hours at 37°C,  
652 under agitation. After washes, they were placed in 1.52 RapiClearR reagent (*SunJiLab*) and stored at  
653 RT, out of the light.

654 Imaging was performed on Spinning disk microscope (Leica) using 25x water-immersion objective at  
655 Institut Jacques Monod (Paris). To control sample positioning and focus, a motorized Prior stage and  
656 piezo Z drive were used. Emission bands of 425-475 nm (blue), 500-550 nm (green), 570-620 nm  
657 (red) and 640-655 nm (far red) were used in confocal mode. Laser intensity was normalized to 80%.  
658 Image processing was performed in Fiji to normalize intensity throughout the depth and denoising.  
659 Images were then opened in Imaris 9 (Oxford Instruments) and used to do the following  
660 quantifications. Satellite cell density measurements were performed using volume plugin on Imaris.

661

#### 662 **Antibodies for *in vitro* experiments**

663 Primary antibodies used include: mouse anti-desmin (1/500, Dako M0760); rabbit anti-ki67 (1/250,  
664 sp6, abcam ab16667); mouse anti-Pax7 (1/100, santa-cruz sc-81648); rabbit anti-MyoD (1/200, cell  
665 signaling D8G3); rabbit anti-MyoG (1/200, santa-cruz SC576 M225); mouse anti-Myosin Heavy Chain  
666 (1/500, MF20 DSHB); Mouse anti-Human HLA-DP, DQ, DR (1 :100, Dako (110843-002/Clone CR3/43);  
667 Rabbit anti-CIITA (1/50, Thermofisher PA521031).

668 Alexa-conjugated secondary antibodies (1/500, Molecular Probes) and DAPI (1/5000).

669 Following immunofluorescence, cells and sections were mounted with Fluoromount-G Mounting

670 Media between slide and coverslip.

671

#### 672 **Antibodies for *ex vivo* and *in vivo* experiments**

673 Primary antibodies used include rabbit anti-ki67 (1/200, abcam sp6); mouse anti-Pax7 (1/100);

674 Rat anti-CD68 (1/100, BD 137002 clone FA11CD31); Rat anti-MHC2 (1/300, Invitrogen 14-5321-85),

675 mouse anti-MYH3 (1/250, Santa Cruz / sc-53091

676 Rabbit anti-Laminin (1/1000, Sigma L9393); Rat anti- mouse CD8 (Novus NBP1-49045SS); Rabbit anti-

677 human CD8 (1/100, Abcam ab4055); Rat anti-CD3 (1/100, Abcam ab11089)

678 Alexa-conjugated secondary antibodies (1/500, Molecular Probes) and DAPI (1/5000)

679 Following immunofluorescence, cells and sections were mounted with Fluoromount-G Mounting

680 Media between slide and coverslip.

681

#### 682 **Automated morphometric analyses**

683 Morphometric analyses were conducted using Fiji, an open-source image-processing package based

684 on ImageJ®, in the digitized images of the entire muscle section. To automatically detect and quantify

685 the number of myofibers and their size (diameters, CSA...) in muscle sections, we used the macro

686 script we developed for the assessment of human and mice histological samples in collaboration with

687 IMRB image platform (For details see <sup>55</sup>).

688

#### 689 **Western Blot**

690 Frozen mice muscles or human muscle cells were homogenized in lysis buffer (RIPA) supplemented

691 with  $\beta$ -glycerophosphate (1mM), protease inhibitor cocktail (1:100; Sigma P8340), phosphatase

692 inhibitor cocktail (1X; *Thermo Fisher scientific, 88668*) and clarified by centrifugation. Proteins

693 quantifications were performed by Pierce™ BCA Protein Assay Kit (*Thermo Fisher Scientific, 23225*)

694 and an equal protein mass of 30ug in 10 $\mu$ L was subjected to NuPAGE™ 4-12 % Bis-Tris Midi Protein  
695 Gels (*Invitrogen™, NP0335BOX*) in Xcell4 Surelock tank (*Life Technology SAS, WR0100*) using  
696 NuPAGE™ MES SDS Running Buffer (20X) (*Invitrogen™, NP000202*). Protein transfer to polyvinylidene  
697 difluoride (PVDF) (*Fisher Scientific, IB401032*) membrane was performed using iBlot2 Dry Blotting  
698 System (*Fisher Scientific, IB21001*) and iBlot™ 2 Transfer Stacks (*Invitrogen™, IB24001*). Membranes  
699 were blocked in fish gelatin solution, then probed with rabbit anti-STAT1 (1:1000; 9172S, Cell  
700 signaling), rabbit anti-Phospho-STAT1 (Tyr701)(1:1000; 44376G, *invitrogen*) and rabbit anti- $\beta$ -tubulin  
701 (9F3) (1:1000; #2128 *Cell signaling*) overnight at 4°C. Membranes were then washed and exposed 1  
702 hour to HRP-conjugated goat anti-rabbit (1:5000; *Santa Cruz, sc-2054*) secondary antibodies. Proteins  
703 were visualized by a chemiluminescence assay kit (*SuperSignal™ West Femto; Fisher scientific*) using a  
704 c600 scanner (*Azure Biosystems, Inc., Dublin, Ohio, USA*) and signals were quantified using ImageJ  
705 software (V1.52s). To perform level expression comparison, the quantification of STAT-1 was divided  
706 by the  $\beta$ -tubulin quantification, and Phospho-STAT1 by STAT1.

707

#### 708 **RNA extraction and Real-Time Quantitative PCR**

709 Total RNA was extracted from muscle sample using TRIzol and total RNA from sorted cells using a  
710 QIAGEN RNeasy Micro or Mini Kit according to the manufacturer's instructions (QIAGEN, Hilden,  
711 Germany). RNA was quantified by Nanodrop. SuperScript III Reverse Transcriptase from the  
712 Invitrogen kit converted RNA into cDNA using the Veriti 96- Well Fast Thermal Cycler (*Applied*  
713 *Biosystems*).

714 Gene expression was quantified by real-time qPCR with the StepOnePlus real-time PCR system  
715 (*Applied Biosystems*) using SYBR Green detection tools (*Applied Biosystems*). Expression of each gene  
716 was normalized to TATA Box Protein (Tbp) gene expression. Results are reported as relative gene  
717 expression (2-DDCT). Specific forward and reverse primers used in this study are listed in *Table 3*.

718

#### 719 **RNA-sequencing of muscle**



720 RNA was prepared as described for RNA extraction and sent to the IMRB (Institut Mondor de  
721 Recherche Biomédicale) genomic platform.

722 Libraries were prepared with TruSeq Stranded Total Library preparation kit (*ref 20020598*) according  
723 to supplier recommendations (Illumina, San Diego, CA). Briefly, the key stages of this protocol are  
724 successively, the removal of ribosomal RNA fraction from 500 ng of total RNA using the Ribo-Zero  
725 Gold Kit; fragmentation using divalent cations under elevated temperature to obtain ~300 bp pieces;  
726 double strand cDNA synthesis using reverse transcriptase and random primers, and finally Illumina  
727 adapters ligation and cDNA library amplification by PCR for sequencing. Sequencing was carried out  
728 on single-end 75 bp of Illumina NextSeq500. Number of Reads 16 millions/sample.

729

### 730 **RNAseq analysis**

731 The samples were quality-checked using the software FastQC (version 0.11.8). We checked that rRNA  
732 depletion had the expected quality (no prokaryotic contamination) and that more than 93% of the  
733 reads mapped to the human genome (GRCh38) using SortMeRNA (version 2.1b), FastQScreen  
734 (version 0.13) and Kraken2 (version 2.0.9 / default database). Trimmomatic (version 0.39) was used  
735 to filter reads using a quality 20 (sliding window of 5 reads) and minimal length of 50pb, which led to  
736 more than 96% of surviving reads. Filtered reads were aligned to the human genome (GRCh38) using  
737 STAR (version 2.6.1d). The mapping of the reads for the different regions of the genome and the level  
738 of gene expression was calculated using RSEM (version 1.3.2). The level of gene expression was  
739 normalized in CPM (counts per million). Differentially expressed genes were determined using edgeR  
740 package. GSEA (Gene Set Enrichment Analysis) were performed with clusterProfiler R package and  
741 GeneOntology database, specifically, Biological process ontology.

742 Heatmaps were created with pheatmap R package with mean normalized counts for each group.

743

### 744 **Statistical analysis**

745 The data were analyzed by analysis of variance. In the event that analysis of variance justified post  
746 hoc comparisons between group means. The test for multiple comparisons is One-way ANOVA,  
747 Tukey's multiple comparison, Two-way ANOVA Sidak's multiple comparisons. For experiments in  
748 which only single experimental and control groups were used, group differences were examined by  
749 unpaired Student's t test. Non-parametric, Mann-Whitney test was used. Pearson's correlation  
750 method was used to perform correlation analysis. Data were expressed as the mean  $\pm$  SEM. All  
751 statistical analyses were performed using Graph- Pad Prism (*version 6.0d, GraphPad Software Inc.,*  
752 *San Diego, CA*). A difference was considered to be significant at \*P < 0.05, \*\*P < 0.01, \*\*\*P < 0.001.

### 753 Extended Data figure legends

754 Supplemental information contains three figures.

#### 755 **Figure S1**

756 **(A)** ACP diseases

757 **(B)** Heatmap pathway IFN-I with the normalized reads per gene of CTL (n=5), DM (n=5), ASS  
758 (n=5) and IBM (n=4) RNA-seq data.

759 **(C)** Heatmap pathway IFN with the normalized reads per gene of CTL (n=5), DM (n=5), ASS (n=5)  
760 and IBM (n=4) RNA-seq data

761 **(D)** Gene ontology analysis for biological processes and KEGG of the downregulated (blue) genes  
762 in Inclusion body myositis (IBM) muscle compared to control (CTL) muscles. Selected  
763 enriched terms are presented according to the fold enrichment.

764 **(E)** Number of mTOR gene transcripts normalized in CPM (counts per million) in DIMs muscle  
765 performed by RNAsequencing.

766

#### 767 **Figure S2**

768 **(A)** Representative 3D reconstruction of immunofluorescence staining of myofibers  
769 (DYSTROPHIN, green) and MHC-II (red) expressions performed on cleared thick CTL and  
770 ASS/IBM muscle sections. Z projection 60um. Champs 1062\*1062 pixels.

771 **(B)** Representative 3D reconstruction of immunofluorescence staining of satellite cells (M-  
772 CADHERIN, yellow) and DAPI (blue) performed on cleared thick CTL and ASS/IBM muscle  
773 sections. Z projection 60um. Champs 1062\*1062 pixels

774 **(C)** Quantification of the number of M-CADHERIN+ satellite cells per volume performed on in CTL  
775 (n=3) and ASS/IBM (n=3) muscles. Mann-Whitney U test, mean $\pm$  SEM.

776

777 **Figure S3**

778 **(A)** Quantification of *ki67* gene expression by RT-qPCR performed on CTL and IFN $\gamma$  exposed-  
779 MPCs. Mann-Whitney U test, means  $\pm$  SEM

780 **(B)** Representative images showing scratch assay to measure cell migration, performed on CTL  
781 MPC and MPC exposed to IFN $\gamma$  for 48 hours.

782 **(C)** Quantification of percentage of wound closure was determined between IFN $\gamma$  and CTL MPCs  
783 at several times 7h, 24h and 48h.

784 **(D)** Luminescent Cell Viability Assay was used to determine the number of viable cells based on  
785 quantitation of the ATP level, performed on IFN $\gamma$ -exposed MPCs versus CTL MPCs. One-way  
786 ANOVA, Kruskal-Wallis test.

787 **(E)** Quantification of membrane permeability in IFN $\gamma$ -exposed cells (1-25 ng/ml) versus non-  
788 exposed cells at 24, 48, and 72 hours post-exposure, using CytoTox-Glo™ Cytotoxicity Assay.  
789 n=3 Statistics performed with One-way ANOVA, Kruskal-Wallis test (ns).

790 **(F)** Quantification of myogenic regulator factors *MyoG*, *Myf6* and *Myf5* gene expression by RT-  
791 qPCR performed on CTL and IFN $\gamma$  exposed-MPCs. Mann-Whitney U test, means  $\pm$  SEM

792

793

794

795

## 796 References

- 797 1. Weihl, C. C. & Mammen, A. L. Sporadic inclusion body myositis - a myodegenerative disease or  
798 an inflammatory myopathy. *Neuropathol. Appl. Neurobiol.* **43**, 82–91 (2017).
- 799 2. Rose, M. R. 188th ENMC International Workshop: Inclusion Body Myositis, 2–4 December 2011,  
800 Naarden, The Netherlands. *Neuromuscul. Disord.* **23**, 1044–1055 (2013).
- 801 3. Ahmed, M. *et al.* Targeting protein homeostasis in sporadic inclusion body myositis. *Sci. Transl.*  
802 *Med.* **8**, 331ra41-331ra41 (2016).
- 803 4. Cacciottolo, M., Nogalska, A., D’Agostino, C., Engel, W. K. & Askanas, V. Dysferlin is a newly  
804 identified binding partner of A $\beta$ PP and it co-aggregates with amyloid- $\beta$ 42 within sporadic  
805 inclusion-body myositis (s-IBM) muscle fibers. *Acta Neuropathol. (Berl.)* **126**, 781–783 (2013).
- 806 5. Dzangué-Tchoupou, G. *et al.* CD8+T-bet+ cells as a predominant biomarker for inclusion body  
807 myositis. *Autoimmun. Rev.* **18**, 325–333 (2019).
- 808 6. Aouizerate, J. *et al.* Myofiber HLA-DR expression is a distinctive biomarker for antisynthetase-  
809 associated myopathy. *Acta Neuropathol. Commun.* **2**, 154 (2014).
- 810 7. Pinal-Fernandez, I. *et al.* Identification of distinctive interferon gene signatures in different types  
811 of myositis. *Neurology* **93**, e1193–e1204 (2019).
- 812 8. Rigolet, M. *et al.* Distinct interferon signatures stratify inflammatory and dysimmune  
813 myopathies. *RMD Open* **5**, e000811 (2019).
- 814 9. Greenberg, S. A. Pathogenesis of inclusion body myositis. *Curr. Opin. Rheumatol.* **32**, 542–547  
815 (2020).
- 816 10. Viktor Steimle, Claire-Anne Siegrist, Annick Mottet & Bernard Mach. Regulation of MHC Class II  
817 Expression by Interferon- $\gamma$  Mediated by the Transactivator Gene CIITA. *Sciences* 106–109  
818 doi:10.1126/science.8016643 (1994).
- 819 11. Muhlethaler-Mottet, A., Di Berardino, W., Otten, L. A. & Mach, B. Activation of the MHC class II  
820 transactivator CIITA by interferon- $\gamma$  requires cooperative interaction between Stat1 and USF-1.  
821 *Immunity* **8**, 157–166 (1998).

- 822 12. Ivashkiv, L. B. IFN $\gamma$  signalling, epigenetics and roles in immunity, metabolism, disease and cancer  
823 immunotherapy. (2018).
- 824 13. Schoenborn, J. R. & Wilson, C. B. Regulation of Interferon- $\gamma$  During Innate and Adaptive Immune  
825 Responses. in *Advances in Immunology* vol. 96 41–101 (Elsevier, 2007).
- 826 14. Foster, W., Li, Y., Usas, A., Somogyi, G. & Huard, J. Gamma interferon as an antifibrosis agent in  
827 skeletal muscle. *J. Orthop. Res.* **21**, 798–804 (2003).
- 828 15. Yoshihashi-Nakazato, Y., Kawahata, K., Kimura, N., Miyasaka, N. & Kohsaka, H. Interferon- $\gamma$ , but  
829 Not Interleukin-4, Suppresses Experimental Polymyositis: Role of IFN $\gamma$  and IL-4 in C protein-  
830 induced myositis. *Arthritis Rheumatol.* **68**, 1505–1510 (2016).
- 831 16. Shelton, G. D. *et al.* Necrotizing Myopathy Induced by Overexpression of Interferon- in  
832 Transgenic Mice. *Muscle Nerve* **22**, 156–165 (1999).
- 833 17. Villalta, S. A. *et al.* Regulatory T cells suppress muscle inflammation and injury in muscular  
834 dystrophy. *Sci. Transl. Med.* **6**, 258ra142-258ra142 (2014).
- 835 18. Greenberg, S. A. Inclusion Body Myositis. *Contin. Minneap. Minn* **22**, 1871–1888 (2016).
- 836 19. Ikenaga, C. *et al.* Clinicopathologic features of myositis patients with CD8-MHC-1 complex  
837 pathology. *Neurology* **89**, 1060–1068 (2017).
- 838 20. Hohlfeld, R. & Engel, A. G. Coculture with autologous myotubes of cytotoxic T cells isolated from  
839 muscle in inflammatory myopathies. *Ann. Neurol. Off. J. Am. Neurol. Assoc. Child Neurol. Soc.* **29**,  
840 498–507 (1991).
- 841 21. Gonias, S. L., Pizzo, S. V. & Hoffman, M. Clearance and distribution of recombinant murine  $\gamma$ -  
842 interferon in mice. *Cancer Res.* **48**, 2021–2024 (1988).
- 843 22. Lortat-Jacob, H., Baltzer, F. & Grimaud, J.-A. Heparin decreases the blood clearance of interferon-  
844  $\gamma$  and increases its activity by limiting the processing of its carboxyl-terminal sequence. *J. Biol.*  
845 *Chem.* **271**, 16139–16143 (1996).
- 846 23. Hardy, D. *et al.* Comparative Study of Injury Models for Studying Muscle Regeneration in Mice.  
847 *PLOS ONE* **11**, e0147198 (2016).

- 848 24. Lauw, F. N. *et al.* Elevated Plasma Concentrations of Interferon (IFN)- $\gamma$  and the IFN- $\gamma$ —Inducing  
849 Cytokines Interleukin (IL)-18, IL-12, and IL-15 in Severe Melioidosis. *J. Infect. Dis.* **180**, 1878–1885  
850 (1999).
- 851 25. Ismaeel, A. *et al.* Role of Transforming Growth Factor- $\beta$  in Skeletal Muscle Fibrosis: A Review. *Int.*  
852 *J. Mol. Sci.* **20**, 2446 (2019).
- 853 26. Bencze, M. *et al.* Proinflammatory Macrophages Enhance the Regenerative Capacity of Human  
854 Myoblasts by Modifying Their Kinetics of Proliferation and Differentiation. *Mol. Ther.* **20**, 2168–  
855 2179 (2012).
- 856 27. Agbulut, O., Noirez, P., Beaumont, F. & Butler-Browne, G. Myosin heavy chain isoforms in  
857 postnatal muscle development of mice. *Biol. Cell* **95**, 399–406 (2003).
- 858 28. Arnold, L. *et al.* Inflammatory monocytes recruited after skeletal muscle injury switch into  
859 antiinflammatory macrophages to support myogenesis. *J. Exp. Med.* **204**, 1057–1069 (2007).
- 860 29. Chazaud, B. *et al.* Satellite cells attract monocytes and use macrophages as a support to escape  
861 apoptosis and enhance muscle growth. *J. Cell Biol.* **163**, 1133–1143 (2003).
- 862 30. Moyle, L. A. & Zammit, P. S. Isolation, Culture and Immunostaining of Skeletal Muscle Fibres to  
863 Study Myogenic Progression in Satellite Cells. in *Stem Cells and Tissue Repair: Methods and*  
864 *Protocols* (ed. Kioussi, C.) 63–78 (Springer New York, 2014). doi:10.1007/978-1-4939-1435-7\_6.
- 865 31. Rajabian, N. *et al.* Bioengineered Skeletal Muscle as a Model of Muscle Aging and Regeneration.  
866 *Tissue Eng. Part A* **27**, 74–86 (2021).
- 867 32. Bigot, A. *et al.* Replicative aging down-regulates the myogenic regulatory factors in human  
868 myoblasts. *Biol. Cell* **100**, 189–199 (2008).
- 869 33. Davalli, P., Mitic, T., Caporali, A., Lauriola, A. & D’Arca, D. ROS, Cell Senescence, and Novel  
870 Molecular Mechanisms in Aging and Age-Related Diseases. *Oxid. Med. Cell. Longev.* **2016**, 1–18  
871 (2016).

- 872 34. Watanabe, Y., Suzuki, O., Haruyama, T. & Akaike, T. Interferon-gamma induces reactive oxygen  
873 species and endoplasmic reticulum stress at the hepatic apoptosis. *J. Cell. Biochem.* **89**, 244–253  
874 (2003).
- 875 35. Probin, V., Wang, Y., Bai, A. & Zhou, D. Busulfan Selectively Induces Cellular Senescence but Not  
876 Apoptosis in WI38 Fibroblasts via a p53-Independent but Extracellular Signal-Regulated Kinase-  
877 p38 Mitogen-Activated Protein Kinase-Dependent Mechanism. *J. Pharmacol. Exp. Ther.* **319**,  
878 551–560 (2006).
- 879 36. Kim, R. H. *et al.* Regulation of p53 during senescence in normal human keratinocytes. *Aging Cell*  
880 **14**, 838–846 (2015).
- 881 37. Keller, C. W., Schmidt, J. & Lünemann, J. D. Immune and myodegenerative pathomechanisms in  
882 inclusion body myositis. *Ann. Clin. Transl. Neurol.* **4**, 422–445 (2017).
- 883 38. Gallay, L., Mouchiroud, G. & Chazaud, B. Interferon-signature in idiopathic inflammatory  
884 myopathies: *Curr. Opin. Rheumatol.* **31**, 634–642 (2019).
- 885 39. Reifenberg, K. *et al.* Interferon- $\gamma$  Induces Chronic Active Myocarditis and Cardiomyopathy in  
886 Transgenic Mice. *Am. J. Pathol.* **171**, 463–472 (2007).
- 887 40. Schmidt, J. *et al.* Interrelation of inflammation and APP in sIBM: IL-1 $\beta$  induces accumulation of  $\beta$ -  
888 amyloid in skeletal muscle. *Brain* **131**, 1228–1240 (2008).
- 889 41. Chazaud, B. *et al.* Dual and beneficial roles of macrophages during skeletal muscle regeneration.  
890 *Exerc. Sport Sci. Rev.* **37**, 18–22 (2009).
- 891 42. Waldburger, J.-M., Suter, T., Fontana, A., Acha-Orbea, H. & Reith, W. Selective abrogation of  
892 major histocompatibility complex class II expression on extrahematopoietic cells in mice lacking  
893 promoter IV of the class II transactivator gene. *J. Exp. Med.* **194**, 393–406 (2001).
- 894 43. Londhe, P. & Davie, J. K. Gamma Interferon Modulates Myogenesis through the Major  
895 Histocompatibility Complex Class II Transactivator, CIITA. *Mol. Cell. Biol.* **31**, 2854–2866 (2011).
- 896 44. Grzelkowska-Kowalczyk, K. *et al.* Transcriptional Regulation of Important Cellular Processes in  
897 Skeletal Myogenesis Through Interferon- $\gamma$ . *J. Interferon Cytokine Res.* **35**, 89–99 (2015).

- 898 45. Muñoz-Espín, D. & Serrano, M. Cellular senescence: from physiology to pathology. *Nat. Rev. Mol.*  
899 *Cell Biol.* **15**, 482–496 (2014).
- 900 46. Kandhaya-Pillai, R. *et al.* TNF $\alpha$ -senescence initiates a STAT-dependent positive feedback loop,  
901 leading to a sustained interferon signature, DNA damage, and cytokine secretion. (2017).
- 902 47. Le Voyer, T. *et al.* JAK inhibitors are effective in a subset of patients with juvenile  
903 dermatomyositis: a monocentric retrospective study. *Rheumatology* (2021).
- 904 48. Mascarenhas, J. & Hoffman, R. Ruxolitinib: The First FDA Approved Therapy for the Treatment of  
905 Myelofibrosis. *Clin. Cancer Res.* **18**, 3008–3014 (2012).
- 906 49. Yi, C. A., Tam, C. S. & Verstovsek, S. Efficacy and safety of ruxolitinib in the treatment of patients  
907 with myelofibrosis. *Future Oncol.* **11**, 719–733 (2015).
- 908 50. Price, F. D. *et al.* Inhibition of JAK-STAT signaling stimulates adult satellite cell function. *Nat. Med.*  
909 **20**, 1174–1181 (2014).
- 910 51. Zhanga, M. *et al.* Selective targeting of JAK/STAT signaling is potentiated by Bcl-xL blockade in IL-  
911 2–dependent adult T-cell leukemia. (2015).
- 912 52. Benveniste, O. *et al.* Sirolimus for treatment of patients with inclusion body myositis: a  
913 randomised, double-blind, placebo-controlled, proof-of-concept, phase 2b trial. *Lancet*  
914 *Rheumatol.* **3**, e40–e48 (2021).
- 915 53. Risson, V. *et al.* Muscle inactivation of mTOR causes metabolic and dystrophin defects leading to  
916 severe myopathy. *J. Cell Biol.* **187**, 859–874 (2009).
- 917 54. Finsterer Josef, Kanzler Marina & Weinberger Alois. Sirolimus myopathy. *Transplantation* **76**,  
918 1773–1774 (2003).
- 919 55. Reyes-Fernandez, P. C., Periou, B., Decrouy, X., Relaix, F. & Authier, F. J. Automated image-  
920 analysis method for the quantification of fiber morphometry and fiber type population in human  
921 skeletal muscle. *Skelet. Muscle* **9**, (2019).



- 922 56. Hoogendijk, J. E. *et al.* 119th ENMC international workshop: Trial design in adult idiopathic  
923 inflammatory myopathies, with the exception of inclusion body myositis, 10–12 October 2003,  
924 Naarden, The Netherlands. *Neuromuscul. Disord.* **14**, 337–345 (2004).
- 925 57. Lloyd TE, Mammen AL, Amato AA, Weiss MD & Needham M. Evaluation and construction of  
926 diagnostic criteria for inclusion body myositis. (2014).
- 927 58. Troyanov, Y. *et al.* Novel Classification of Idiopathic Inflammatory Myopathies Based on Overlap  
928 Syndrome Features and Autoantibodies: Analysis of 100 French Canadian Patients. *Medicine*  
929 *(Baltimore)* **84**, 231–249 (2005).
- 930 59. Le Roux, I., Konge, J., Le Cam, L., Flamant, P. & Tajbakhsh, S. Numb is required to prevent p53-  
931 dependent senescence following skeletal muscle injury. *Nat. Commun.* **6**, 8528 (2015).
- 932

**A**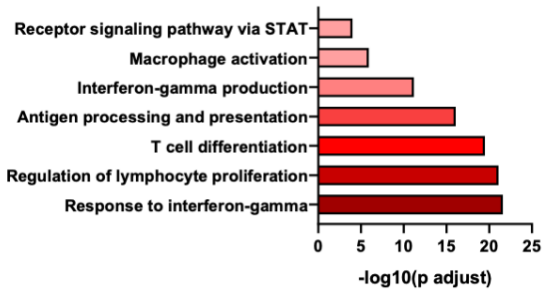**B**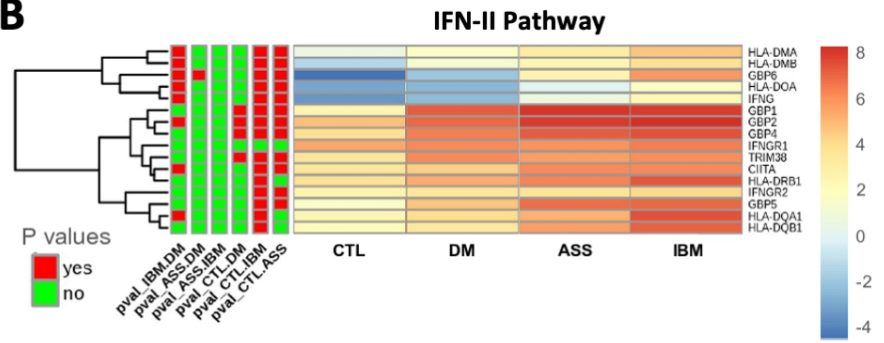**C**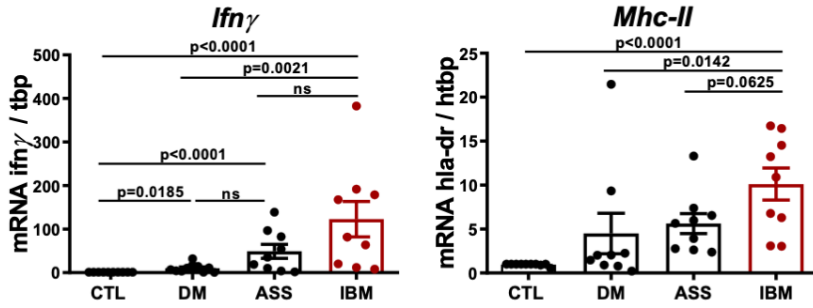**D**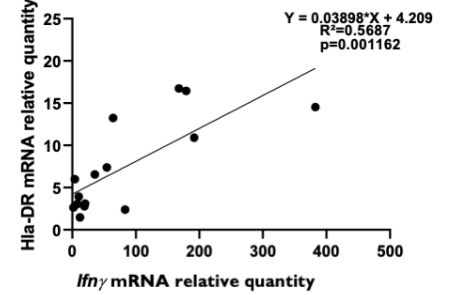**E**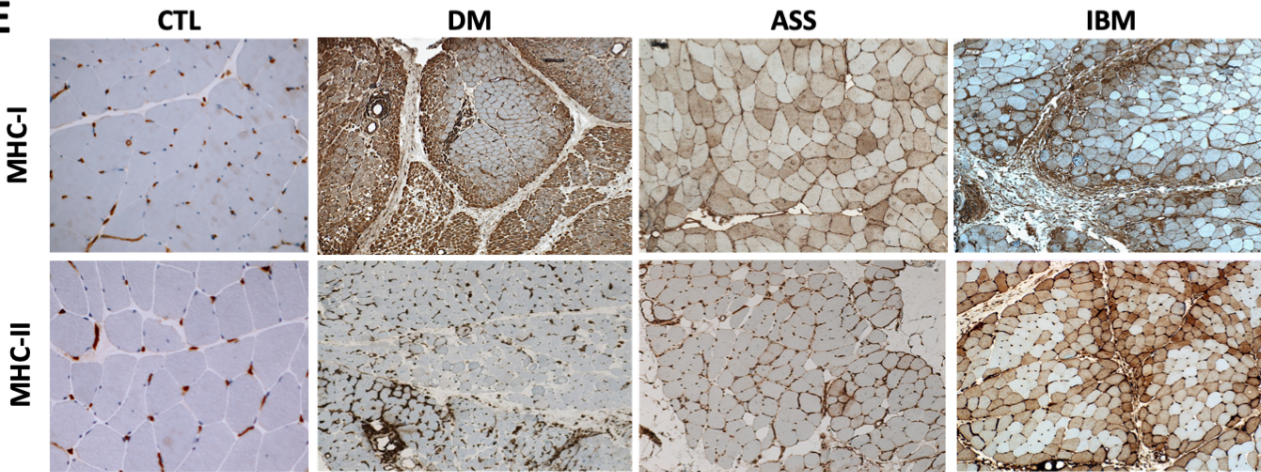**F**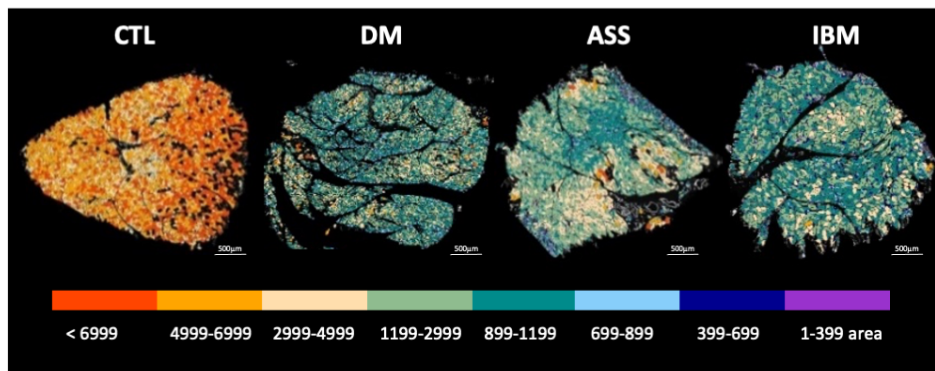**G**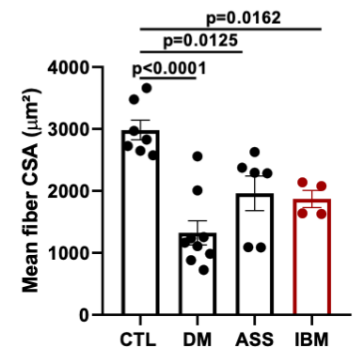**H**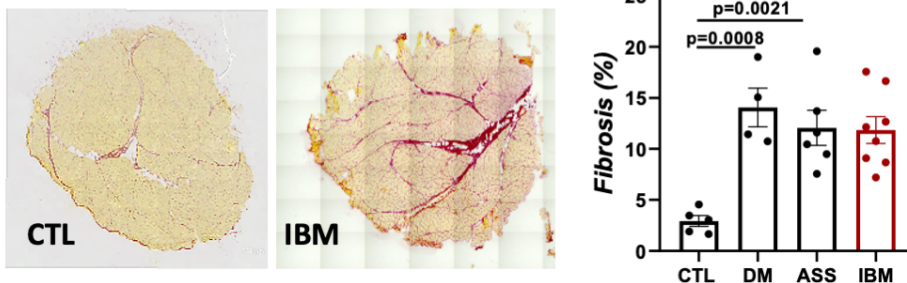**I**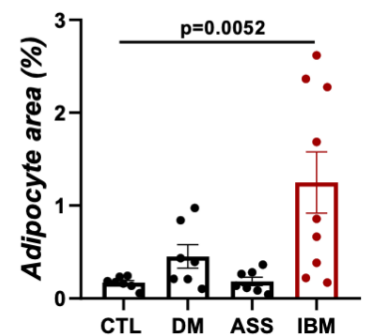

**A**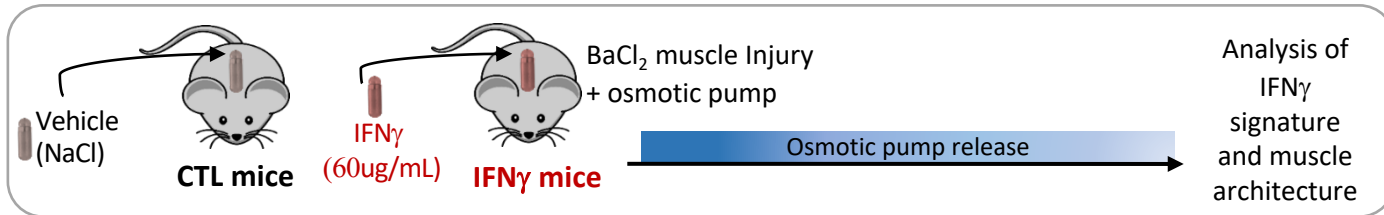**B**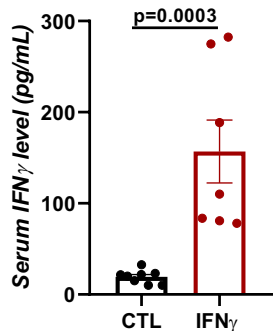**C**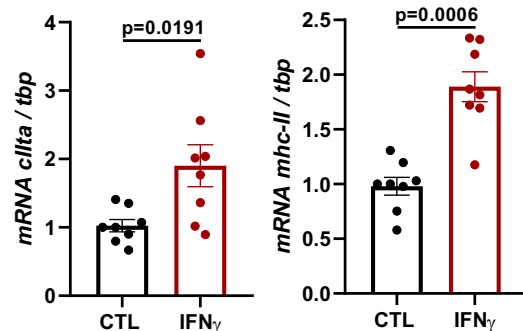**D**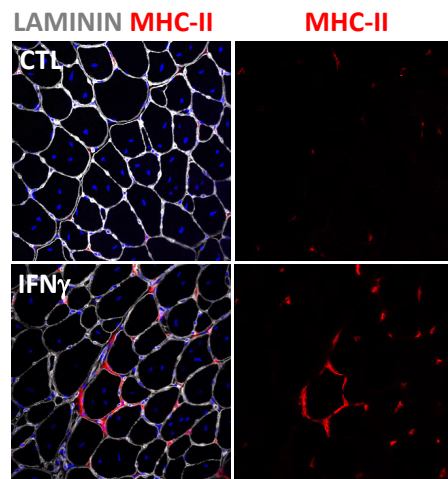**E**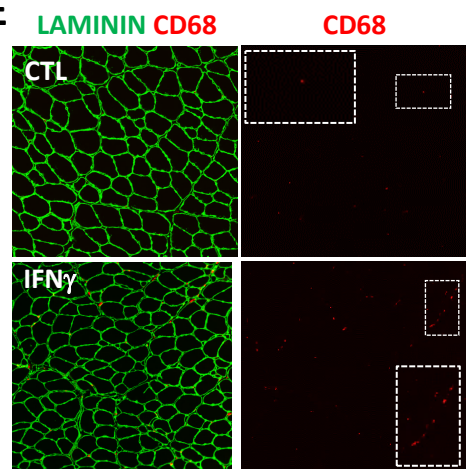**F**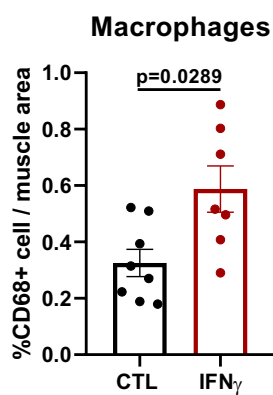**G**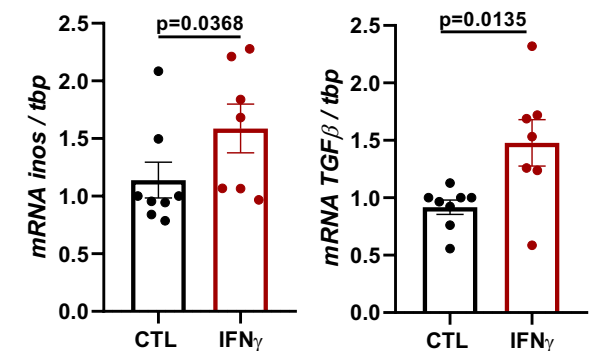**H**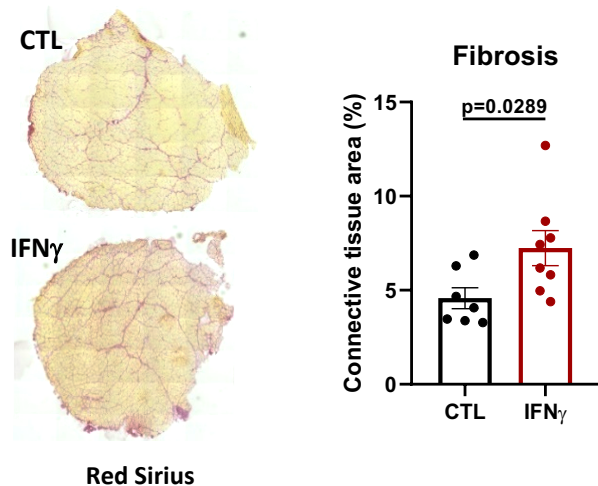**I**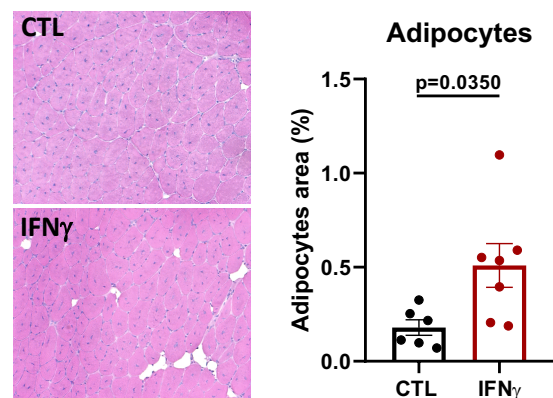

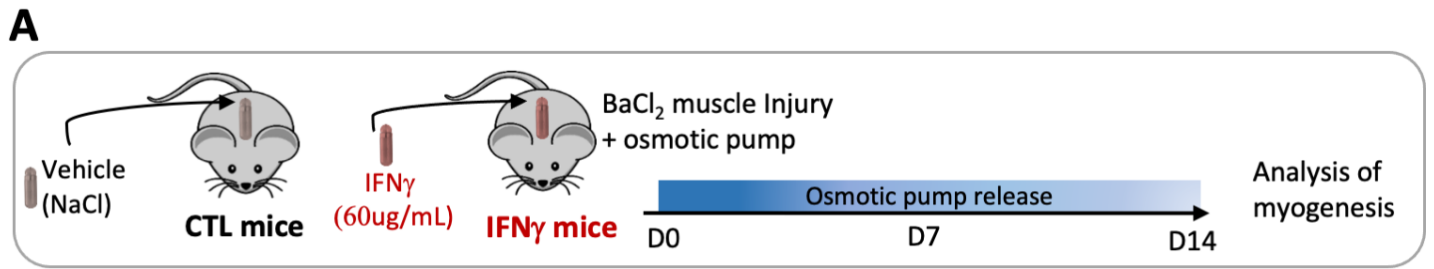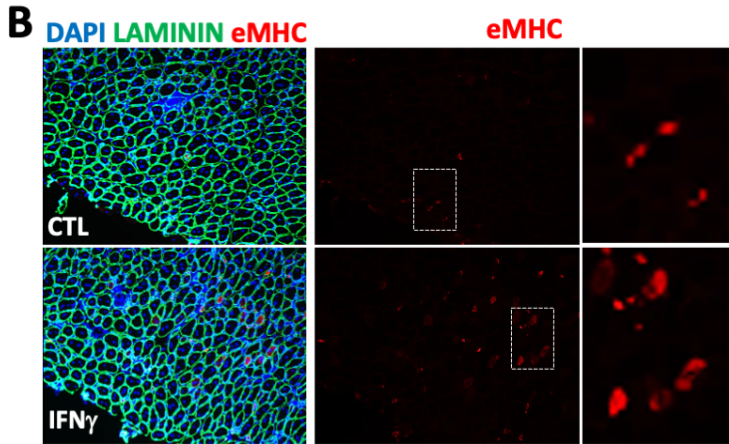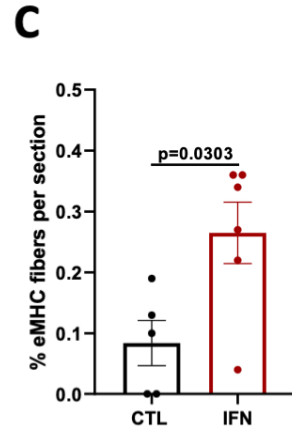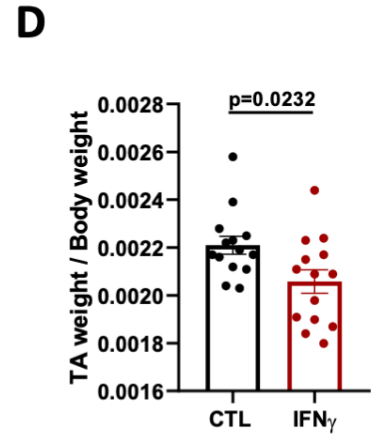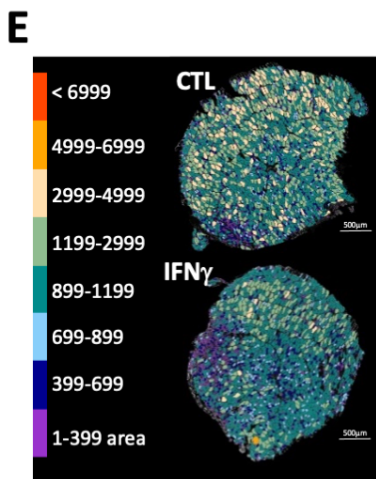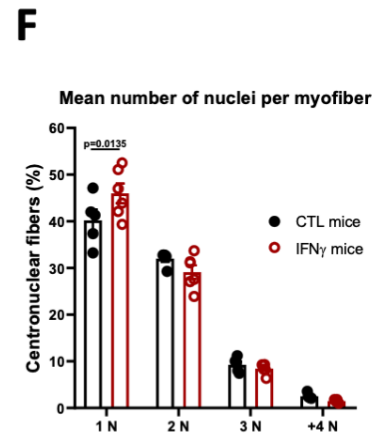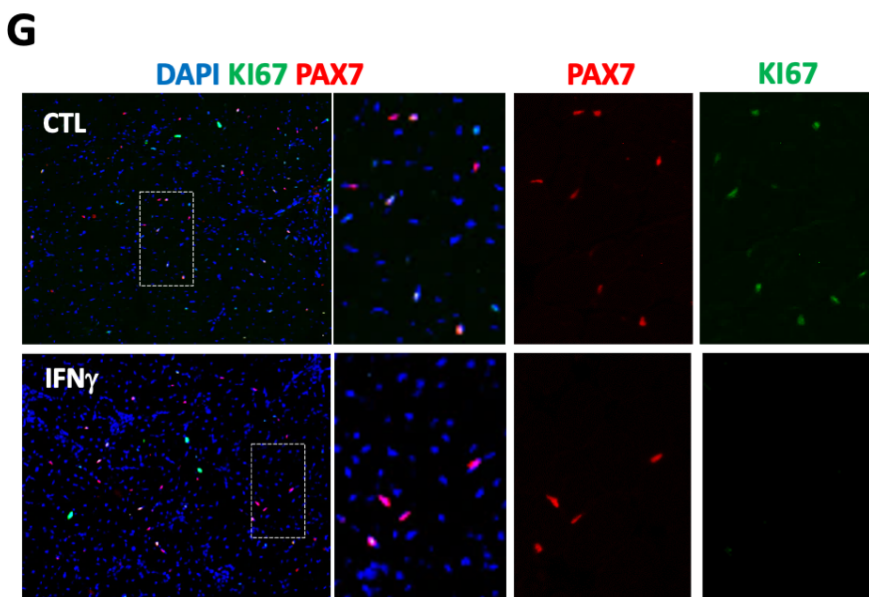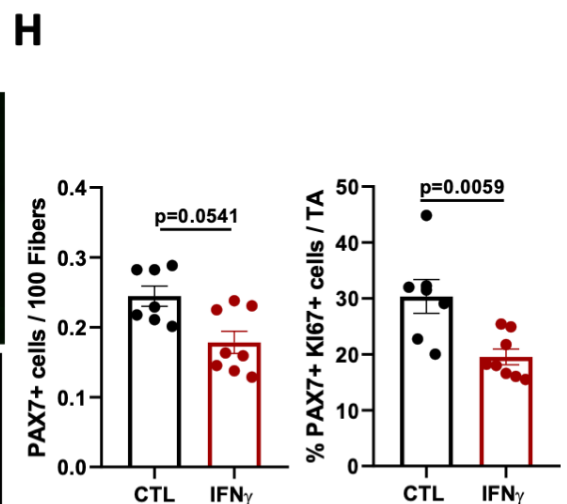

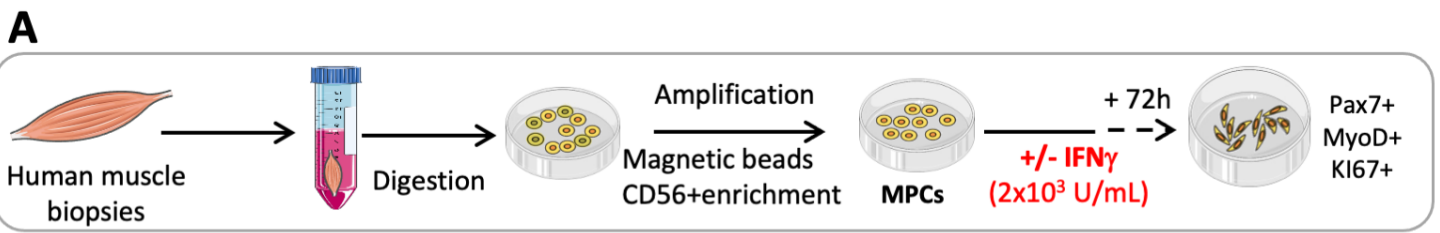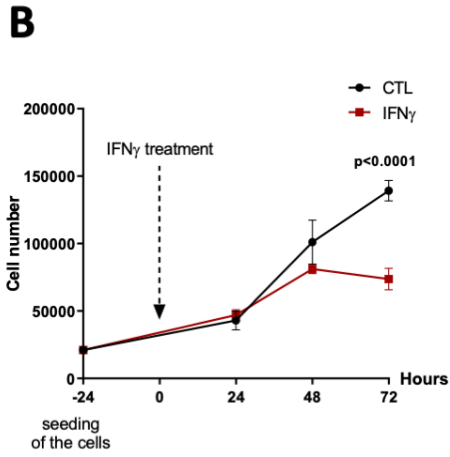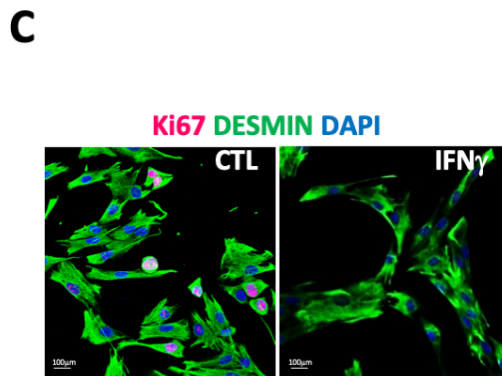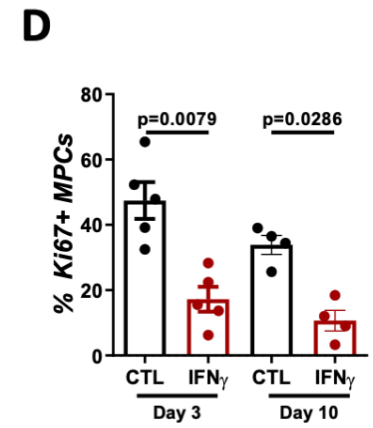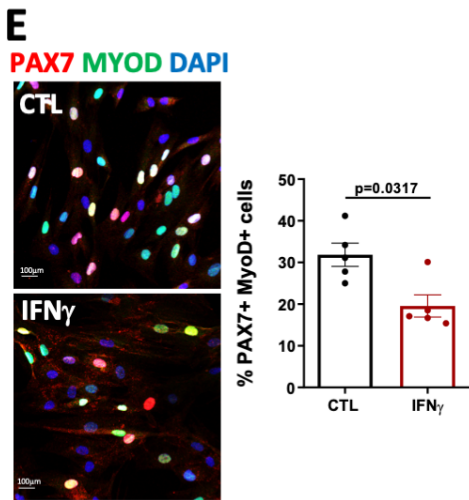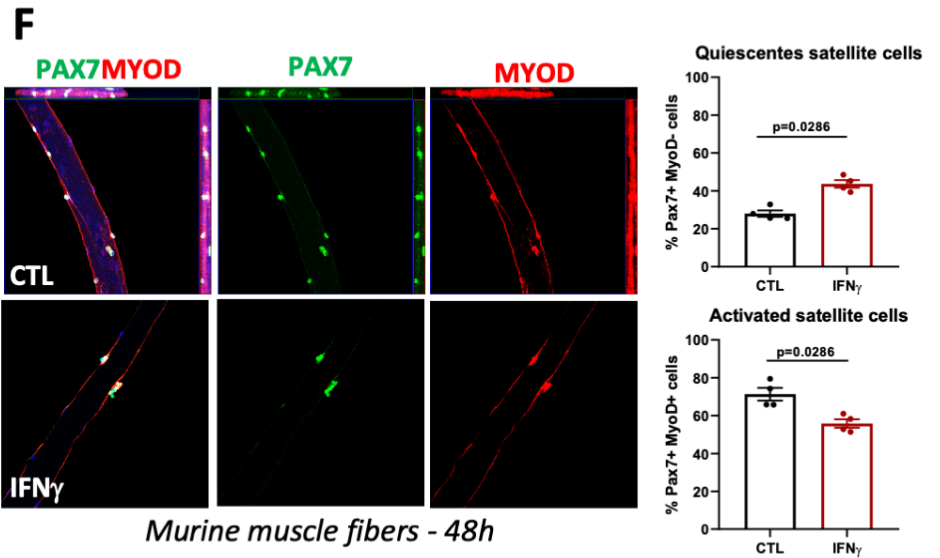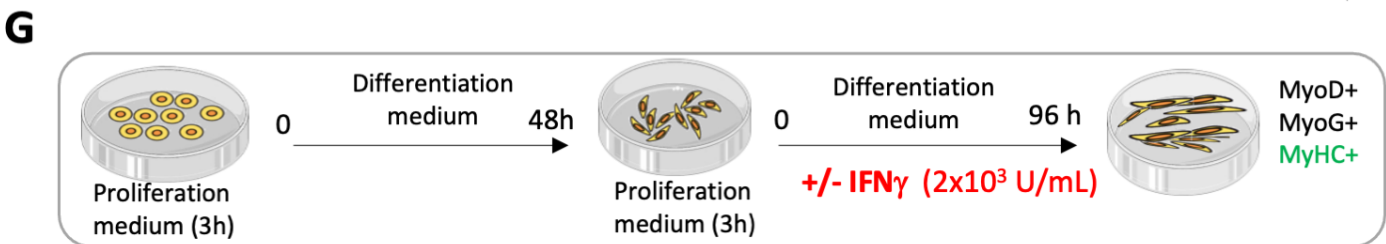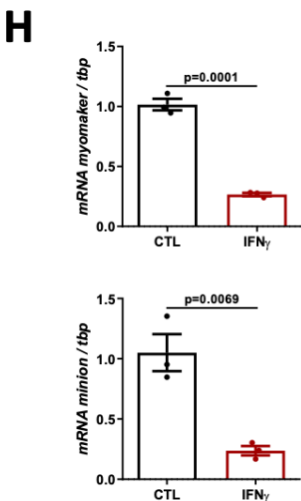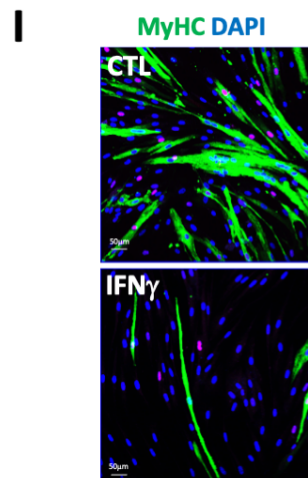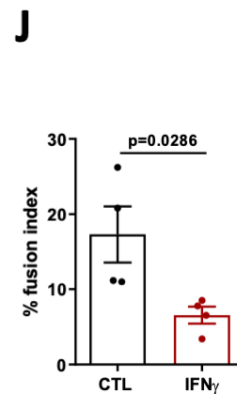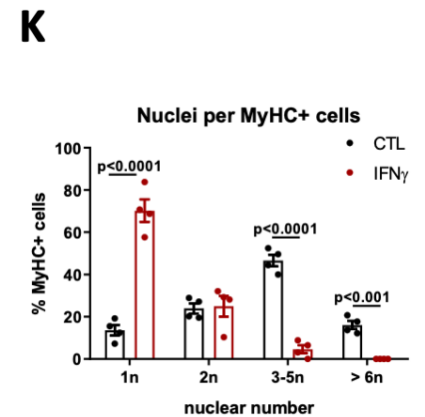

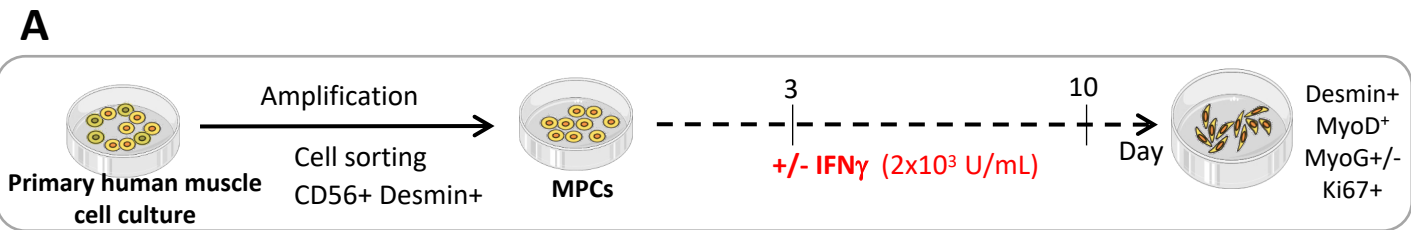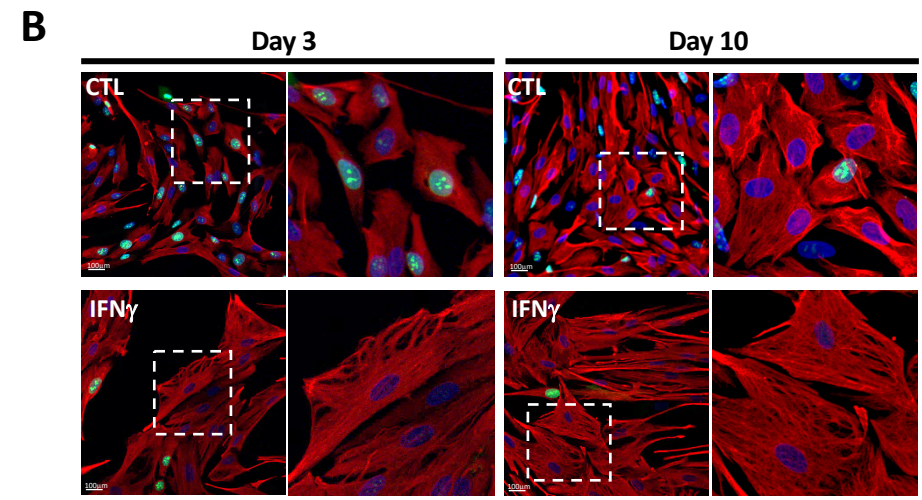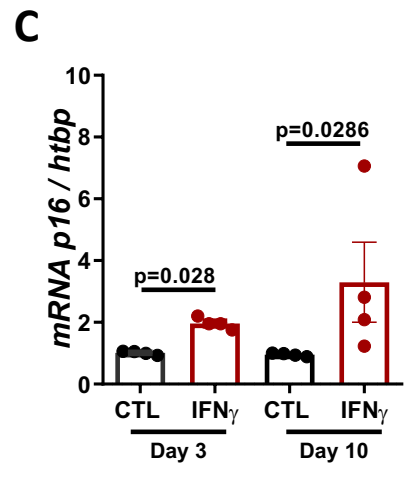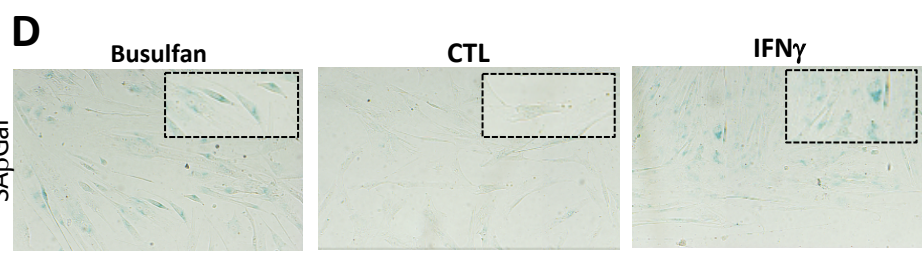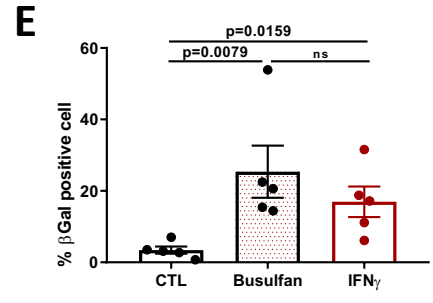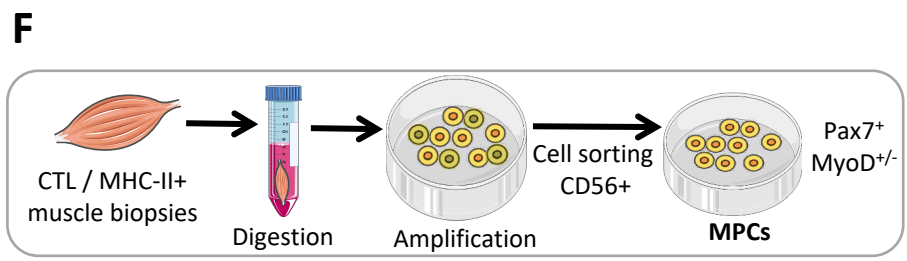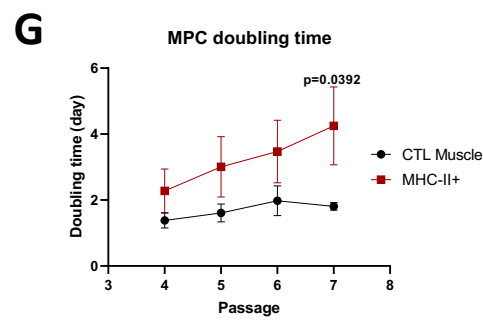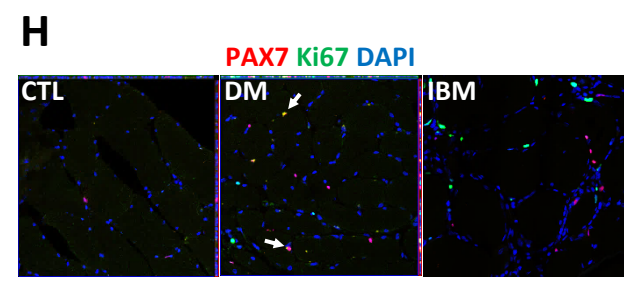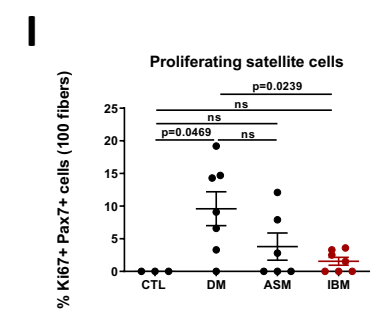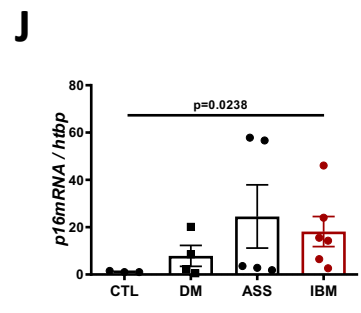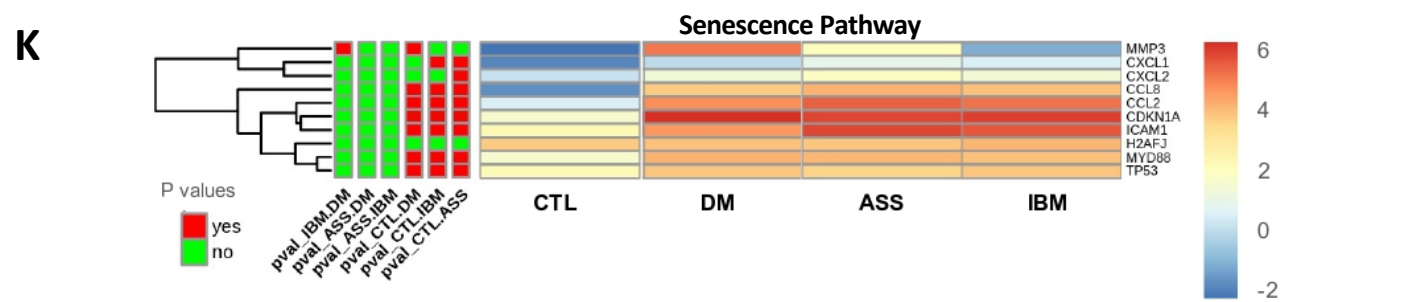

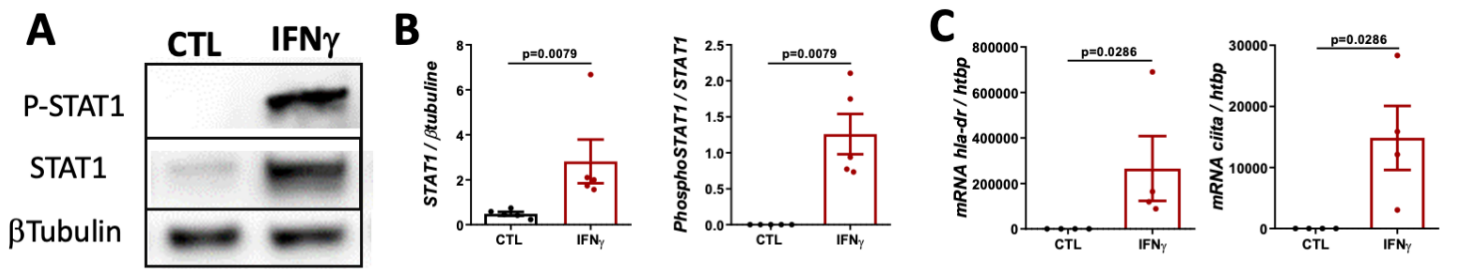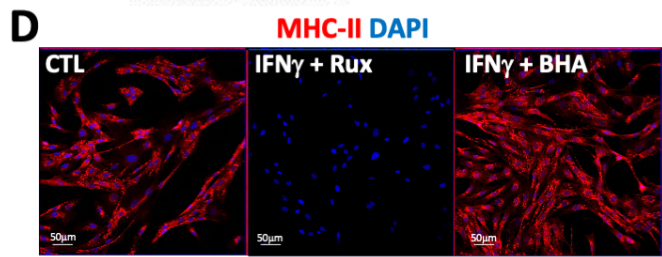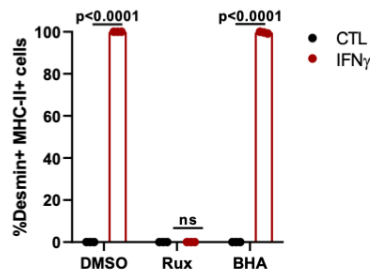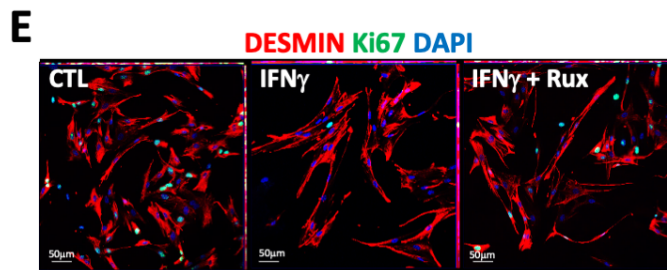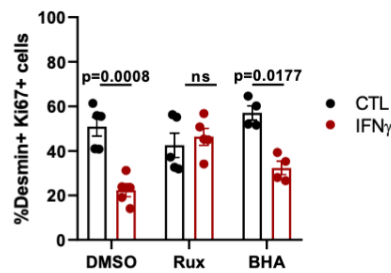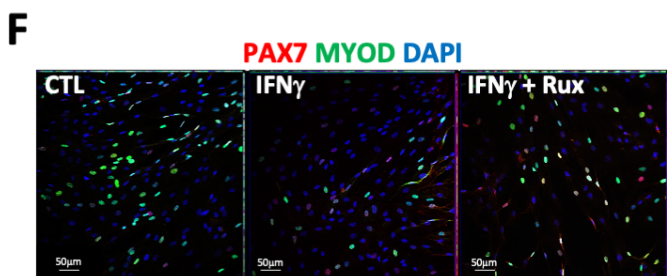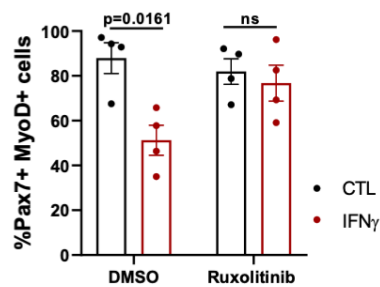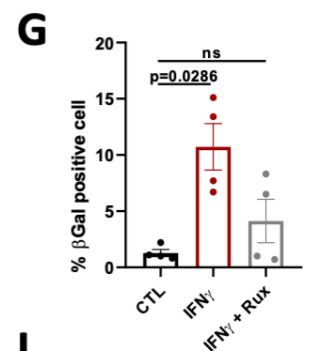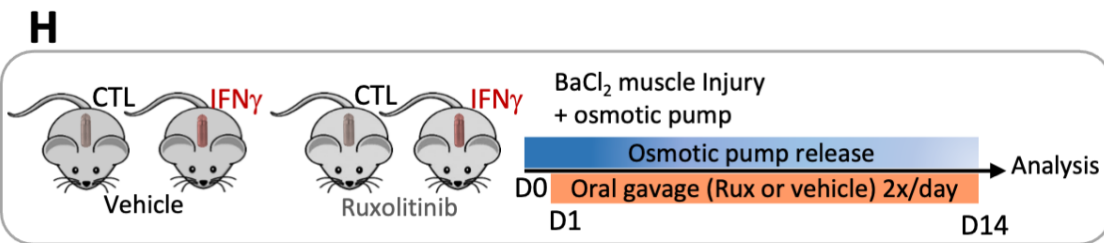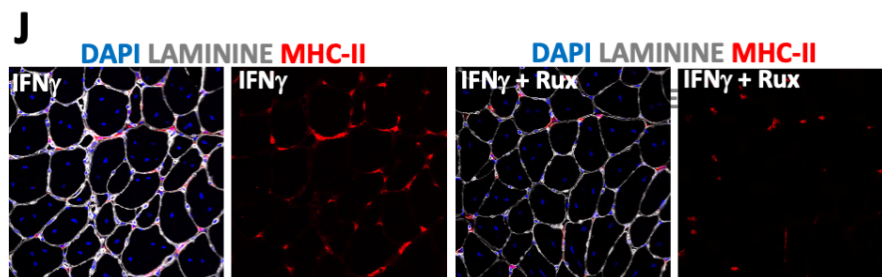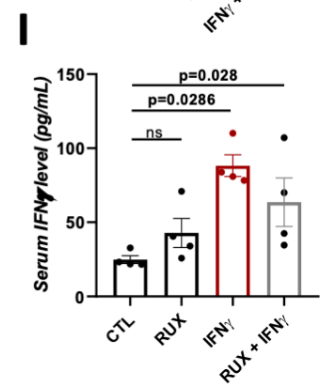

**K** Weight of Tibialis anterior muscle

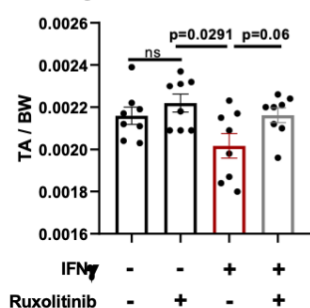

**L**

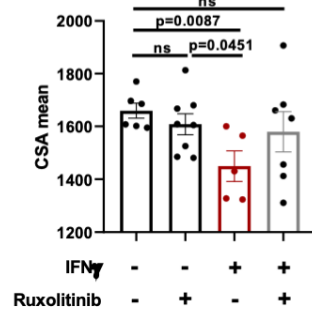

**M**

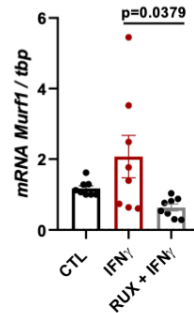

**N**

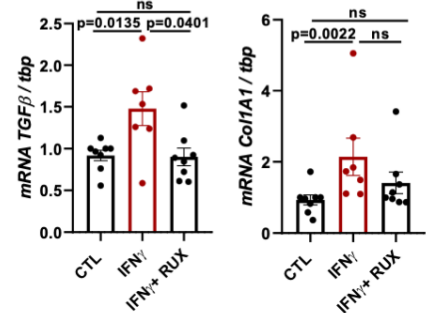

Source: http://biorxiv.org/content/10.1101/2021.12.16.472927v1.full.pdf
